# Kisspeptin Signaling in the Brain

Amy E. Oakley, Donald K. Clifton, and Robert A. Steiner

Departments of Physiology and Biophysics (A.E.O., R.A.S.) and Obstetrics and Gynecology (D.K.C., R.A.S.), University of Washington, Seattle, Washington 98195-6460

Kisspeptin (a product of the *Kiss1* gene) and its receptor (GPR54 or Kiss1r) have emerged as key players in the regulation of reproduction. Mutations in humans or genetically targeted deletions in mice of either *Kiss1* or *Kiss1r* cause profound hypogonadotropic hypogonadism. Neurons that express *Kiss1*/kisspeptin are found in discrete nuclei in the hypothalamus, as well as other brain regions in many vertebrates, and their distribution, regulation, and function varies widely across species. Kisspeptin neurons directly innervate and stimulate GnRH neurons, which are the final common pathway through which the brain regulates reproduction. Kisspeptin neurons are sexually differentiated with respect to cell number and transcriptional activity in certain brain nuclei, and some kisspeptin neurons express other cotransmitters, including dynorphin and neurokinin B (whose physiological significance is unknown). Kisspeptin neurons express the estrogen receptor and the androgen receptor, and these cells are direct targets for the action of gonadal steroids in both male and female animals. Kisspeptin signaling in the brain has been implicated in mediating the negative feedback action of sex steroids on gonadotropin secretion, generating the preovulatory GnRH/LH surge, triggering and guiding the tempo of sexual maturation at puberty, controlling seasonal reproduction, and restraining reproductive activity during lactation. Kisspeptin signaling may also serve diverse functions outside of the classical realm of reproductive neuroendocrinology, including the regulation of metastasis in certain cancers, vascular dynamics, placental physiology, and perhaps even higher-order brain function. (*Endocrine Reviews* 30: 713–743, 2009)

- I. Introduction
- II. Nomenclature
- III. Biochemistry
  - A. Signaling
  - B. Active form
  - C. Analogs
- IV. Comparative Anatomy
  - A. Nonmammalian vertebrates
  - B. Mammals
- V. Molecular Physiology of Kiss1 Neurons
- VI. Comparative Physiology
  - A. Direct and indirect effects of kisspeptin on GnRH neurons
  - B. Pituitary effects
  - C. Continuous *vs.* pulsatile exposure to kisspeptin
  - D. Negative feedback action of sex steroids on *Kiss1* gene expression in ARC
  - E. Circadian signals and positive feedback action of estradiol on *Kiss1* gene expression in AVPV
  - F. Differential regulation of *Kiss1* gene expression by estradiol in the brain
  - G. Kisspeptin in pregnancy, lactation, and aging
  - H. Metabolic regulation
    - I. Seasonality
    - J. Puberty
    - K. Sexual differentiation
- VII. Action outside the Hypothalamic-Pituitary Axis
  - A. Hippocampus and amygdala
  - B. Adrenal
  - C. Pancreatic islets
  - D. Ovary/oviduct
  - E. Vasculature
- VIII. Closing Remarks: Challenges, Open Questions, and Future Directions
 

“*Somewhere, something incredible is waiting to be known.*”

— Carl Sagan (1934–1996), astronomer, cosmologist, writer

ISSN Print 0021-972X ISSN Online 1945-7197

Printed in U.S.A.

Copyright © 2009 by The Endocrine Society

doi: 10.1210/er.2009-0005 Received February 4, 2009. Accepted August 10, 2009.

First Published Online September 21, 2009

Abbreviations: AR, Androgen receptor; ARC, arcuate nucleus; ARKO, aromatase knockout; AVPV, anteroventral periventricular nucleus; DAG, diacylglycerol; DBB, diagonal band of Broca; DMH, dorsomedial hypothalamus; ER $\alpha$ ,  $\alpha$ -estrogen receptor; ERE, estrogen response element; GPCR, G protein-coupled receptor; GPR54, G protein-coupled membrane receptor 54; IP<sub>3</sub>, inositol triphosphate; -ir, immunoreactive; MBH, medial basal hypothalamus; ME, median eminence; NKB, neurokinin B; NVT, nucleus ventral tuberis; PeN, periventricular nucleus; PKC, protein kinase C; PLC, phospholipase C; POA, preoptic area; PR, progesterone receptor; RF-amide, Arg-Phe-NH<sub>2</sub>; RFRP, RMRamide-related peptide; RMRamide, Phe-Met-Arg-Phe-NH<sub>2</sub>; SCN, suprachiasmatic nucleus; TRPC, transient receptor potential canonical; VH, ventral hypothalamus; VMH, ventromedial hypothalamic nucleus.

## I. Introduction

Since kisspeptin burst onto the scientific stage, it has soared to prominence—particularly with respect to its role in the neuroendocrine regulation of reproduction. Originally discovered as a metastasis-suppressor gene in 1996 (1), *KISS1* was named for its role as a suppressor sequence (ss); the letters “KI” were appended to the prefix “SS” to form “KISS” in homage to the location of its discovery, Hershey, Pennsylvania, home of the famous “Hershey Chocolate Kiss.” Although the term metastin had been coined for the 54-amino acid product of the *Kiss1* gene, another research group named the family of neuropeptides coded by the *Kiss1* gene, kisspeptins (2). Use of both terms continues to this day, with cancer biologists largely preferring the term metastin, whereas investigators in other fields have favored the term kisspeptin. In 2001, four independent groups identified kisspeptin (Table 1) as a high-affinity RFamide (Arg-Phe-NH<sub>2</sub>) peptide ligand for a then orphan G protein-coupled membrane receptor, GPR54 (2–5). GPR54, now termed “Kiss1r” for its role as a kisspeptin receptor (Table 1), was initially described in the rat in 1999 (6), and shortly thereafter, the human homolog of GPR54 (*KISS1R*; then referred to as AXOR12 or hOT7T175) was identified (2–4). In 2003, kisspeptin-*KISS1R* signaling piqued the interest of reproductive physiologists when two independent re-

search groups nearly simultaneously reported that mutations in *KISS1R* were associated with the idiopathic hypothalamic hypogonadism and impaired pubertal maturation found in their patients (7, 8). Moreover, studies of mice bearing targeted deletions of *Kiss1r* produced the same phenotypic anomaly of reproductive dysfunction (8, 9). Thus emerged the idea that kisspeptin-*KISS1R* signaling plays a vital role in reproduction. This review will focus on kisspeptin signaling in the brain—particularly as it relates to reproduction. Although a search for understanding the function of kisspeptin in cancer biology and organs outside of the brain remains a vigorous area of exploration, a detailed review of this subject is beyond the scope of this review and is summarized elsewhere (10).

## II. Nomenclature

A recent review by Gottsch *et al.* (11) highlights the need for consistency in kisspeptin nomenclature and offers recommendations to unify terms across (and within) the various research fields. The kisspeptin receptor has been formerly referred to as AXOR12, hOT7T75, GPR54, *KISS1R*, *KISS1*, and the metastin receptor (1–4, 12) (Table 1). There is more difficulty distinguishing among the kisspeptin gene, the mRNA, and the protein of different species. Gottsch *et al.* (11) suggest using the term kisspeptin in reference to the

**TABLE 1.** A summary of terms used to describe *KISS1/KISS1R* and kisspeptins and suggested usage [Modified with permission from Gottsch, *et al.* (11)]

|        | Current usage                     |                                                                                                                                              | Suggested usage                                                                                               |                                                                                  |                                                                                                                                   |
|--------|-----------------------------------|----------------------------------------------------------------------------------------------------------------------------------------------|---------------------------------------------------------------------------------------------------------------|----------------------------------------------------------------------------------|-----------------------------------------------------------------------------------------------------------------------------------|
|        | Gene/mRNA                         | Peptide                                                                                                                                      | Gene/mRNA                                                                                                     | Peptide                                                                          |                                                                                                                                   |
| KISS1  | Rodent and other nonhuman species | <i>KISS-1</i> , <i>KISS1</i> , <i>Kiss-1</i> , <i>Kiss1</i> (typically italicized for the gene and not for mRNA)<br>MGI format: <i>Kiss1</i> | Metastin, Kisspeptin-145, -54, -14, -13, -10 (abbreviated Kp-145–Kp-10)                                       | For rodents and all other nonhuman species: <i>Kiss1</i>                         | Kisspeptin-145–Kisspeptin-10, abbreviated Kp-145–10                                                                               |
|        | Human                             | <i>KISS-1</i> , <i>KISS1</i> (typically italicized for the gene and not for mRNA)<br>MGI format: <i>KISS1</i>                                | Kisspeptin-1 (68-121) (aka metastin) or kisspeptin/metastin (112-121)<br><br>KISS-1 peptide<br>KISS-1 protein | <i>Kiss1</i> (mRNA)                                                              | With Kp-145 representing the entire 145 aa peptide, Kp-54 (aa 68-121), Kp-14 (aa 108-121), Kp-13 (aa 109-121), Kp-10 (aa 112-121) |
| KISS1R | Rodent and other nonhuman species | GPR54, <i>Gpr54</i><br>MGI format: <i>Kiss1r</i>                                                                                             | GPR54, Kiss1R                                                                                                 | <i>KISS1</i>                                                                     | Kisspeptin (Kp)–145-10                                                                                                            |
|        | Human                             | AXOR12, HOT7T175, <i>GPR54</i> , <i>KISS1R</i> , metastin receptor<br>MGI format: <i>KISS1R</i>                                              | Human metastin 45-54                                                                                          | <i>KISS1</i> (mRNA)                                                              | Kp54 (metastin)                                                                                                                   |
| KISS1R | Rodent and other nonhuman species | GPR54, <i>Gpr54</i><br>MGI format: <i>Kiss1r</i>                                                                                             | GPR54, Kiss1R                                                                                                 | For rodents and all other nonhuman species: <i>Kiss1r</i> , <i>Kiss1r</i> (mRNA) | Kisspeptin (or Kiss1) receptor, abbreviated Kiss1r                                                                                |
|        | Human                             | AXOR12, HOT7T175, <i>GPR54</i> , <i>KISS1R</i> , metastin receptor<br>MGI format: <i>KISS1R</i>                                              | GPR54, <i>KISS1</i> (GPR54)                                                                                   | <i>KISS1R</i><br><br><i>KISS1R</i> (mRNA)                                        | Kisspeptin (or <i>KISS1</i> ) receptor, abbreviated <i>KISS1R</i>                                                                 |

protein product(s) of the coding gene(s). Based on recommendations from the international committees established to standardize nomenclature (<http://www.informatics.jax.org/mgihome/nomen/gene.shtml>), *KISS1* and *Kiss1* should be used to represent the human and nonhuman kisspeptin genes, respectively (Table 1). The nonitalicized versions of the gene nomenclature should be used to refer to the protein products of *KISS1* (*i.e.*, KISS1 for human and Kiss1 for other species), although spelling-out “kisspeptin” is also appropriate (11). For the receptor, the Human Genome Nomenclature Committee recommends the use of *KISS1R* for the human kisspeptin receptor gene. Following the same convention that applies to the ligand, *Kiss1r* denotes the nonhuman receptor gene or mRNA, and KISS1R and Kiss1r denote the receptor protein for human and nonhuman species, respectively (11) (Table 1). The nomenclature referenced in Table 1 will be used throughout this review.

### III. Biochemistry

#### A. Signaling

G protein-coupled receptors (GPCRs) transduce a variety of inputs to activate signaling pathways involved in diverse functions such as cell growth, proliferation, and migration. The GPCR superfamily can be classified into three subdivisions, *e.g.*, rhodopsin-, secretin-, and metabotropic glutamate receptor-like families (13). Typical of the rhodopsin family of GPCRs, Kiss1r contains seven transmembrane domains, with three glycosylation sites at the N terminus (5). Kiss1r is most similar to the galanin receptor family (~45% homologous), although it does not bind either galanin or galanin-like peptide (6). Screens for agonists that bind Kiss1r identified several neuropeptides of the RFamide and RWamide family (5). The RMRFamide (Phe-Met-Arg-Phe-NH<sub>2</sub>)-related peptides (RFRPs), of which Kiss1 is a member, constitute a superfamily of neuropeptides that terminate with the sequence Arg-Phe-NH<sub>2</sub> and exist in all phyla (14, 15).

The binding of Kiss1r by Kiss1 peptide leads to the activation of G protein-activated phospholipase C (PLC $\beta$ ), suggesting a G $\alpha_{q/11}$ -mediated signaling pathway (2, 3, 16–18) (Fig. 1). PLC $\beta$  activation leads to the generation of the intracellular second messengers, inositol triphosphate (IP<sub>3</sub>) and diacylglycerol (DAG); these signaling molecules in turn mediate intracellular Ca<sup>2+</sup> release and activation of protein kinase C, respectively (16, 18). Kisspeptin is thought to stimulate GnRH secretion by activating transient receptor potential canonical (TRPC)-like channels and inhibiting inwardly rectifying potassium channels (19), likely mediated by DAG and/or Ca<sup>2+</sup>. Additionally, Kiss1r has been shown to stimulate arachidonic acid re-

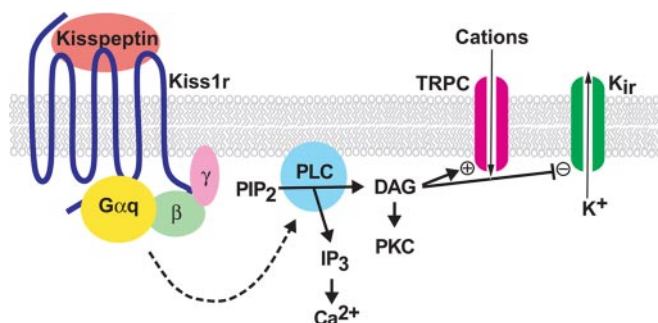

**FIG. 1.** Proposed mechanism of neuronal depolarization by kisspeptin binding to its receptor, Kiss1r. Kisspeptin binding to its GPCR, Kiss1r, activates the G protein, G $\alpha_q$ , and PLC to cleave phosphatidylinositol 4,5-bisphosphate (PIP<sub>2</sub>) into IP<sub>3</sub> and DAG. DAG activates a signal cascade by activating PKC, whereas IP<sub>3</sub> mobilizes calcium ions (Ca<sup>2+</sup>), which participate in the cascade by activating other proteins. Membrane depolarization is caused by activation (+) of nonselective TRPC cation channels and inhibition (–) of inwardly rectifying potassium channels (K<sub>ir</sub>), possibly through involvement of DAG.

lease and ERK1/2 and p38 activation, as well as Rho activation, which causes stress fiber formation (2, 20). Endogenous kisspeptin may activate Kiss1r via a ligand transportation pathway, in which initial binding of a ligand to the membrane is followed by lateral diffusion to the receptor (21). Current efforts are aimed at understanding more about the coupling of Kiss1r and G proteins. By examining the efficacy of signaling in various models of Kiss1r mutations, one recent report has identified the IL2-10 residue as a key player in the structural rearrangement of Kiss1r upon binding of the ligand, kisspeptin (22). This approach may shed new light on fundamental concepts regarding GPCR/G protein signaling of kisspeptin and other ligand-receptor interactions.

Mutations and targeted deletions of *KISS1R/Kiss1r* cause profound hypogonadotropic hypogonadism in humans and mice. Various disabling mutations in *KISS1R* have been shown to occur in humans (23), and these mutations have involved deletion of as many as 155 nucleotides or as few as a single-nucleotide variant (L148S) in the second intracellular loop of the *KISS1R* gene (7, 24, 25). Recently, an activating mutation has also been described for the *KISS1R* in the human, which leads to precocious puberty (26). This mutation involves the substitution of proline for arginine at codon 386 (Arg386Pro), which causes prolonged intracellular KISS1R signaling in response to kisspeptin (26).

#### B. Active form

The initial product of the *Kiss1* gene is a 145-amino acid peptide, from which is cleaved a 54-amino acid protein known as kisspeptin-54 (27) (Fig. 2). In the full-length protein, the sequence of kisspeptin-54 is surrounded by pairs of basic residues, where furin or prohormone con-

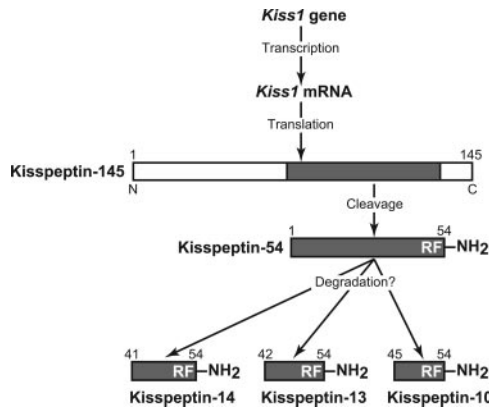

**FIG. 2.** Products of the *Kiss1* gene. *Kiss1* mRNA is transcribed from the *Kiss1* gene and translated to form a 145-amino-acid propeptide called kisspeptin-145. Shown are cleavage sites on the propeptide that lead to the production of the RF-amidated kisspeptin-54. Shorter peptides (such as kisspeptin-10, -13, and -14) share a common C terminus and RF-amidated motif with kisspeptin-54. Because no putative cleavage sites have been identified on the propeptide that would lead to synthesis of the shorter peptides, such peptides may be degradation products of kisspeptin-54. [Adapted with permission from Popa *et al.*, 2008 (202) © Annual Reviews].

vertases are thought to proteolytically cleave (2). There are also shorter peptides (kisspeptin-10, -13, and -14) that share a common RF-amidated motif with kisspeptin-54; collectively, they are termed kisspeptins. Although no obvious cleavage sites have been identified that would result in these shorter peptides, it has been suggested that kisspeptin-54 is unstable and may be proteolytically cleaved into the shorter products (2). All four peptides (kisspeptin-10, -13, -14, and -54) exhibit the same affinity and efficacy for the Kiss1r, indicating that the C-terminal end of the peptide is responsible for the binding and activation of the receptor, Kiss1r (2). Although all four kisspeptin products are biologically active (3), the *in vivo* relevance of the shorter peptides is as yet unknown.

Because members of the RFamide family of peptides often share several identical C-terminal amino acid residues, the generation of specific antisera has been a technical challenge. For example, many of the available KISS1 antisera raised against the shortened C-terminal human peptide cross-react with other members of the RFRPs (*i.e.*, RFRP-1 and RFRP-3) [preliminary data, Ref. 28]. RFRP-1 and RFRP-3 have been shown to stain strongly in the dorsomedial hypothalamus (DMH; an area that is not known to express *Kiss1* mRNA) with marked fiber projections in the arcuate nucleus (ARC) (29–34), which raises the possibility that previous kisspeptin antibodies demonstrating similar staining patterns may exhibit cross-reactivity with these related RFRPs. The reader is therefore advised to view kisspeptin antibody staining results with caution, unless unequivocal evidence for antibody specificity is established.

### C. Analogs

Despite a critical role for kisspeptin signaling in both cancer and reproductive biology, only recently has progress been made in the development of novel ligands or pharmacologically therapeutic agents (agonists or antagonists). Instead of employing a random high-throughput screening approach for potential ligands, Orsini *et al.* (35) have identified a model kisspeptin pharmacophore utilizing a structure-activity relationship approach combining nuclear magnetic resonance, receptor binding, and functional assays. A structure-derived pharmacophore search has the advantage of yielding potential ligands that interact with the receptor in a binding mode similar to endogenous kisspeptin. The authors demonstrated that the kisspeptin-13 peptide has a relatively stable helix conformation from residues 7 to 13, with three functionally key residues (Phe9, Arg12, and Phe13) that lie on one face of the helix and define its pharmacophore site (35). Through amino acid substitution, Gutiérrez-Pascual *et al.* (36) have identified alanine at positions 6 and 10 as critical for kisspeptin-10 action at Kiss1r, pointing to potential modifications that could lead to new kisspeptin analogs. The stereochemistry of kisspeptin analog amino acids also appears to be of major importance; substitution of key residues with the d-isomer significantly decreases peptide agonist activity (37). Utilizing a structure-activity relationship approach, Tomita *et al.* (38–41) have identified several pentapeptide kisspeptin analogs as novel Kiss1r agonists. Molecules identified that mimic the key features of the pharmacophore site can act as full agonists, although with reduced potency compared with kisspeptin itself (35).

Several approaches have been used to block kisspeptin-Kiss1R signaling. Kinoshita *et al.* developed a monoclonal anti-rat kisspeptin antibody that, when infused in the preoptic area (POA), completely blocks the proestrus LH surge and inhibits estrous cyclicity (42) (Fig. 3). Most recently, Roseweir *et al.* (43) have developed several kisspeptin antagonists via amino acid substitution of kisspeptin-10 analogs. Based on its structure-activity profile, one potent and specific antagonist (“peptide 234”) was selected for use in *ex vivo* and *in vivo* studies. This antagonist inhibits the kisspeptin-induced rise in LH secretion in mice and rats and blocks the postcastration LH rise in rodents and sheep, suggesting a powerful role of kisspeptin neurons in mediating the negative feedback action of sex steroids on the hypothalamic-pituitary gonadal axis (43). Furthermore, the antagonist inhibits kisspeptin-10-induced GnRH neuronal firing in the mouse brain and reduces pulsatile GnRH secretion in female pubertal monkeys (43), underscoring the importance of kisspeptin signaling in the control of GnRH secretion.

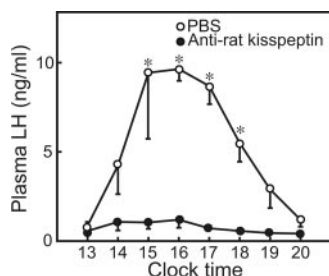

**FIG. 3.** Effect of POA infusion of antirat kisspeptin monoclonal antibody on the proestrous LH surge. PBS ( $n = 6$ ) or antirat kisspeptin monoclonal antibody ( $n = 5$ ) was infused into the POA at 1000–1800 h. Blood samples were collected every hour at 1300–2000 h through an indwelling atrial cannula. Values are means  $\pm$  SEM. \*,  $P < 0.05$  vs. vehicle-treated control (one-way ANOVA with repeated measures). [Modified with permission from Kinoshita *et al.*, 2005 (42) © The Endocrine Society].

#### IV. Comparative Anatomy

The distribution and physiology of kisspeptin-Kiss1r signaling has been explored in a variety of species. Although the location and developmental timing and patterns of expression differ among species, this pathway clearly plays an important role in reproduction in many vertebrates; however, given their diversity, the extraordinary range of reproductive strategies, and our incomplete knowledge of the functional significance of kisspeptin signaling across these species, it is difficult (and hazardous) to draw unifying themes. Nevertheless, a current comprehensive description of the development, localization, and sexual differentiation of kisspeptin and its receptor for all species studied to date (summer 2009) follows.

##### A. Nonmammalian vertebrates

The anatomy and physiology of Kiss1/Kiss1r signaling in fish has recently been reviewed (44, 45). A variety of piscine species have been studied; however, a unified synopsis of kisspeptin physiology in fish is complicated by several factors. First, there is an astonishing diversity of reproductive strategies among species of fish (*i.e.*, semelparous, iteroparous, hermaphroditic species). Second, fish occupy a vast range of environmental niches—much wider and more diverse than mammals. Third, the time to sexual maturity varies considerably across species; and fourth, investigators studying fish have taken different experimental approaches to investigate kisspeptin biology. Most information collected on the kisspeptin system in fish consists of work exploring the receptor, Kiss1r. Indeed, it was not until 2008 that information on kisspeptin neurons was reported in nonmammalian vertebrates. Details on developmental expression, localization, and sexual differentiation of Kiss1 and Kiss1r in piscine species studied to date are summarized below.

##### 1. Tilapia (*Oreochromis niloticus*)

Parhar *et al.* (46) were the first to identify Kiss1r in any piscine species and to report colocalization of Kiss1r and GnRH expression in neurons of the tilapia. It is notable that this was the first report of colocalization of Kiss1r and GnRH neurons in any species—an early benchmark establishing that GnRH neurons are direct targets for the action of kisspeptin. Utilizing a single-cell gene profiling (laser-captured microdissection) approach, these investigators demonstrated *Kiss1r* transcript expression in all three teleost GnRH neuronal types: GnRH-I (POA), GnRH-II (midbrain tegmentum), and GnRH-III (caudal-most part of the olfactory bulbs) (46). The POA GnRH-I is thought to control the synthesis and release of LH and FSH in most vertebrate species, and GnRH-I neurons have been shown to innervate the anterior pituitary in teleosts (47). Conspicuously, the developmental pattern of Kiss1r expression in tilapia appears to correspond with that of the GnRH-I receptor, both of which display an increase between 3–4 and 6–7 wk after hatch, corresponding with the onset of puberty (48). Assuming translation into increased Kiss1r protein, an increase in *Kiss1r* expression in GnRH cells could plausibly increase the responsiveness of GnRH neurons to kisspeptin, thus contributing to the increase in GnRH secretion associated with the onset of puberty. Although no sex differences were identified in *Kiss1r* expression in the brain, higher levels of *Kiss1r* expression were observed in the pituitary of females (48). The expression of *Kiss1r* was also evaluated in the heart, kidney, liver, gonad, and muscle, but expression was near the limits of detection in these tissues (48).

##### 2. Gray mullet (*Mugil cephalus*)

Mullet Kiss1r shares a 95% sequence homology with the tilapia receptor and is expressed in the brain, pituitary, and ovary. In this species, just as in the tilapia, Kiss1r may play a role in reproductive development, based on the observation that mullet *Kiss1r* is induced in the brain just at the onset of puberty (49). Moreover, the pattern of *Kiss1r* gene expression is positively correlated with that of GnRH-II and GnRH-III (49), suggesting coordinated roles of Kiss1r and GnRH in the brain at the early stages of puberty. At more advanced stages of reproductive development, levels of the *Kiss1r* transcript in the ovary are increased compared with expression levels in the brain (49), suggesting a supporting role of the Kiss1/Kiss1r signaling in gonadal development, as well as in the neuroendocrine axis.

##### 3. Cobia (*Rachycentron canadum*)

In the brain of the cobia, the expression of *Kiss1r* mRNA peaks at 26 d after hatching, during the juvenile stage (47). Notably, the pattern of *Kiss1r* expression and

all three *GnRH* mRNAs (*GnRH*-I, -II, -III) is remarkably similar throughout the early larval and juvenile periods of development (47). Again, these findings point to a potential relationship between *Kiss1r* and multiple *GnRH*s and implicate *Kiss1r* in the development and maturation of the reproductive system in piscine species.

#### 4. Senegalese sole (*Solea senegalensis*)

Analysis of the Senegalese sole (*Ss*) *Kiss1r* by Mechaly *et al.* (50) revealed features indicative of alternative splicing. RT-PCR identified two distinct transcripts differentiated by approximately 80 bp in length and named *Ss Kiss1r\_v1* (or short *Ss Kiss1r*) and *Ss Kiss1r\_v2* (or long *Ss Kiss1r*). The two isoforms exhibit differential patterns of expression in various tissues. In the brain, levels of *Ss Kiss1r\_v1* mRNA are higher than those of *Ss Kiss1r\_v2*, whereas in the gonads, the predominant isoform is *Ss Kiss1r\_v2* (50). Outside of the brain, both isoforms are expressed in the testis, liver, muscle, stomach, heart, spleen, and kidney, whereas the ovary and gall bladder express only the *Ss Kiss1r\_v2* isoform, and the intestine expresses only the *Ss Kiss1r\_v1* isoform (50). However, both isoforms exhibit changes in expression as a function of sex and maturational stage. For example, in the brain, levels of the mRNAs of both isoforms are higher in the pubertal compared with mature female sole (50), suggesting that kisspeptin signaling may play a “gatekeeper” role for timing the onset of puberty in this as well as other piscine species.

#### 5. Fathead minnow (*Pimephales promelas*)

In the adult fathead minnow, *Kiss1r* mRNA is expressed throughout the brain and in the pituitary and gonad, but it is undetectable in muscle, intestine, liver, or gill (51). In the brain, *Kiss1r* is expressed predominantly in the telencephalon (including the POA); moderately in the olfactory bulbs and tracts, optic tectum, and hypothalamus/midbrain tegmentum; and at low levels in the optic nerves, medulla oblongata, and cerebellum (51). Sexual dimorphism in the expression of *Kiss1r* is not evident in the whole brain. In the brain, the highest expression of *Kiss1r* occurs in regions where the *GnRH* genes are highly expressed (51). Moreover, the developmental pattern of *Kiss1r* expression closely aligns with the expression of *GnRH*-III, the hypophysiotropic form of *GnRH* in the fathead minnow (which, like other cyprinids, does not seem to express *GnRH*-I) (51). Neural *Kiss1r* expression increases at the onset of puberty in both male and female fathead minnows; moreover, these high levels correspond with the appearance of spermatogonia in the testis in males and of cortical alveolus stage oocytes in the ovary in females. The expression of *Kiss1r* in the brain is

4-fold higher in sexually mature females compared with prepubertal females (51). Furthermore, injections of mammalian kisspeptin-10 into early to midpubertal fish induced expression of *GnRH*-III and *Kiss1r* in the brain, suggesting an autoregulatory effect of kisspeptin on its own receptor (51).

#### 6. Medaka (*Oryzias latipes*)

The kisspeptin receptor, *Kiss1r*, has been characterized in several piscine species, as detailed in the preceding sections; however, it was not until 2008 that kisspeptin neurons were studied in nonmammalian vertebrates. Utilizing RT-PCR, Kanda *et al.* (52) revealed the expression of *Kiss1* mRNA in the brain, testis, and stomach (and its absence in the ovary, liver, intestine, and retina) of the medaka. *In situ* hybridization identified two distinct hypothalamic nuclei that contain *Kiss1*-expressing neuronal cell bodies: the nucleus posterioris periventricularis and the nucleus ventral tuberis (NVT) (52). The NVT *Kiss1* neurons are sexually dimorphic in number (male neurons  $\gg$  female neurons) and steroid sensitive, whereas nucleus posterioris periventricularis neurons are neither (52). For instance, estrogen treatment rescues the ovariectomy-initiated decrease in *Kiss1*-expressing neurons of the NVT (52), indicating the necessity of the sex steroids for the maintenance of *Kiss1* expression. This research group suggests that the *Kiss1/Kiss1r* system plays a role in triggering the onset of puberty, based on the preliminary demonstration that neural *Kiss1* and *Kiss1r* increase dramatically during sexual maturation in this species (53).

Recent work by Parhar and colleagues (54) has identified a gene similar to the *Kiss1* gene identified by Kanda. This novel kisspeptin gene, an RFamide (as distinguished from an RY-amide), has been named *Kiss2* (Fig. 4). Medaka *Kiss2* is expressed in the brain (periventricular hypothalamus), testis, ovary, intestine, kidney, and heart (54), hinting at a role in reproductive as well as nonreproductive processes. Moreover, *Kiss1* mRNA-containing cells are found in the ventromedial region of the habenula and in the posterior tuberal nucleus zone of the periventricular hypothalamus (54), where their physiological significance has yet to be revealed.

#### 7. Goldfish (*Carassius auratus*)

Recent work by Li *et al.* reveals that goldfish express *Kiss1* and *Kiss2* as well as their putative cognate receptors, *Kiss1ra* and *Kiss1rb* (55). The *Kiss1* gene is highly expressed in the optic tectum thalamus, intestine, kidney, and testis, whereas the *Kiss2* gene is mainly detected in the hypothalamus, telencephalon, optic tectum, thalamus, adipose tissue, kidney, heart, and gonads. The two receptor genes (*Kiss1ra* and *Kiss1rb*) are highly expressed in brain

**Kisspeptin 1**

|                               |                            |
|-------------------------------|----------------------------|
| <b>Human</b> (NP_002247)      | <b>Y N W N S F G L R F</b> |
| <b>Chimpanzee</b> (XP_514123) | <b>Y N W N S F G L R F</b> |
| <b>Macaque</b> (XP_001098284) | <b>Y N W N S F G L R F</b> |
| <b>Pig</b> (ACB99811)         | <b>Y N W N S F G L R Y</b> |
| <b>Cattle</b> (XP_872566)     | <b>Y N W N S F G L R Y</b> |
| <b>Horse</b> (XP_001489086)   | <b>Y R W N S F G L R Y</b> |
| <b>Sheep</b> (AAAY56323)      | <b>Y N W N S F G L R Y</b> |
| <b>Mouse</b> (NP_839991)      | <b>Y N W N S F G L R Y</b> |
| <b>Rat</b> (NP_859043)        | <b>Y N W N S F G L R Y</b> |
| <b>Opossum</b> (NP_001137604) | <b>Y N W N S F G L R Y</b> |
| <b>Frog</b> (DAA06348)        | <b>Y N W N S F G L R Y</b> |
| <b>Medaka</b> (AB272755)      | <b>Y N L N S F G L R Y</b> |
| <b>Zebrafish</b> (AB245404)   | <b>Y N L N S F G L R Y</b> |
| <b>Sea Bass</b> (ACM07422)    | <b>Y N L N S F G L R Y</b> |
| <b>Goldfish</b> (ACI96030)    | <b>Y N L N S F G L R Y</b> |

**Kisspeptin 2**

|                             |                            |
|-----------------------------|----------------------------|
| <b>Frog</b> (BX850386)      | <b>F N F N P F G L R F</b> |
| <b>Medaka</b> (AB439562)    | <b>F N Y N P F G L R F</b> |
| <b>Zebrafish</b> (AB439561) | <b>F N Y N P F G L R F</b> |
| <b>Sea Bass</b> (ACM07423)  | <b>F N F N P F G L R F</b> |

**FIG. 4.** Kisspeptin-10 sequences. Alignment of deduced amino acid sequences (from BLAST) of *Kiss1* and *Kiss2* in vertebrates. Conserved amino acid residues are in *bold*.

regions including telencephalon, optic tectum, thalamus, and hypothalamus, as well as in peripheral tissue, including the gonads and adipose tissue; additionally, *Kiss1rb* is expressed in liver, intestine, gill, heart, and kidney (55). Furthermore, both mature goldfish kisspeptin-10 peptides (*Kiss1*–10 and *Kiss2*–10) can functionally interact with the two receptors expressed in cultured cells, indicating that they are biologically active (55). Utilizing RT-PCR coupled to laser capture microdissection, Yang *et al.* (56) found *Kiss1r* expression in gonadotrophs, somatotrophs, and lactotrophs of the goldfish pituitary, as well as *Kiss1* expression in somatotrophs. Moreover, incubation with kisspeptin-10 increases basal levels of LH, GH, and PRL mRNA in goldfish pituitary cells, suggesting a direct action of kisspeptin at the level of the pituitary.

**8. Zebrafish (*Danio rerio*)**

Two different kisspeptin genes (*Kiss1* and *Kiss2*), as well as two distinct kisspeptin receptors (*Kiss1ra* and *Kiss1rb*), have been characterized in the zebrafish. The two receptors differ in their tissue expression distribution; they are sexually dimorphic, and they signal through unique transduction pathways. They share approximately 60% sequence identity with each other, with *Kiss1ra* being more similar to other piscine *Kiss1r* (91% identity) and *Kiss1rb* being more like mammalian *Kiss1r* (57). Both zebrafish kisspeptin receptors are highly expressed in the brain. *Kiss1ra* is also expressed at high levels in the gonads

(testis  $\gg$  ovary), and *Kiss1rb* is highly expressed in the pituitary, spleen, gills, kidney, intestines, pancreas, and adipose tissue (57). A role in puberty onset is suggested by real-time PCR analysis, which revealed increasing levels of *Kiss1ra* mRNA in the brain of both male and female zebrafish (females  $\gg$  males) until the age when gonads contain well-developed oocytes and spermatozoa (57). Recent work has begun to explore the pathways through which these receptors signal. Using serum-responsive element-luc and cAMP-responsive element-luc reporter systems to follow protein kinase C (PKC) and protein kinase A pathway activation, Biran *et al.* (57) demonstrated that zebrafish *Kiss1ra* transduces its activity via the PKC pathway, whereas *Kiss1rb* does so via both PKC and protein kinase A pathways. Zebrafish *Kiss1ra* and *Kiss1rb* are both highly expressed in the hindbrain. *Kiss1ra* is moderately expressed in the telencephalon, and *Kiss1rb* is moderately expressed in the diencephalon and midbrain (57). The neuronal circuitry linking the expression of kisspeptin to its target cells and receptors has yet to be fully elucidated (in any species).

Both zebrafish *Kiss1* and *Kiss2* are expressed in the brain (*Kiss1* in the ventromedial region of the habenula, and *Kiss2* in the posterior tuberal nucleus and the periventricular hypothalamus), testis, and intestine, whereas *Kiss1* is also expressed in the pituitary, adipose tissue, pancreas, heart, and liver, and *Kiss2* in the ovary and kidney (54, 57, 58). Zebrafish *Kiss1*, *Kiss2*, *GnRH-II*, and *GnRH-III* mRNA levels all show an increase in expression at the start of the pubertal phase (54), demonstrative of a potential role in controlling the onset of puberty. It is notable that ip injections of *Kiss2* decapeptide (but not *Kiss1*) into sexually mature female zebrafish activates gonadotropin gene expression (*lh $\beta$*  and *fsH $\beta$* ) in the pituitary (54), implicating *Kiss2* as the principal regulator of gonadotropin synthesis and thus a powerful regulator of reproduction.

**9. Sea bass (*Dicentrarchus labrax*)**

Reports of a *Kiss1/Kiss1r* system have recently been made in the European sea bass. Results indicate the expression of two *Kiss1r* and two *Kiss1*-like genes. Preliminary data suggest that both *Kiss1r* genes are expressed largely in the brain, pituitary, testis, and ovary and less so in the spleen, kidney, liver, intestine, gill, heart, eye, skin, and muscle of prepubertal and pubertal male and female sea bass (59). Both kisspeptin genes (*Kiss1* and *Kiss2*) are expressed principally in the brain and gonadal tissues of pubertal sea bass and do not appear to demonstrate developmental stage or sex specificity (60, 61). Intramuscular injections of both *Kiss1* and *Kiss2* stimulate gonadotropin secretion in prepubertal sea bass (preliminary data), suggesting that the *Kiss1/Kiss1r* system is involved in pu-

bertal development (60, 62). Exciting new work by Carrillo and colleagues (63) has begun to identify the distribution of the sea bass kisspeptin-immunoreactive (ir) system through the use of rabbit antibodies against mouse Kiss-10. Their recent studies suggest that the kisspeptin expression is prominent in the nucleus posterioris periventricularis and projects to a variety of areas of the brain, including the thalamic region, the midbrain tegmentum, and the pituitary stalk. Furthermore, Kiss1 fibers appear to appose GnRH-II neurons in the midbrain tegmentum, as demonstrated via preliminary double-staining (63). This pioneering work with Kiss1 protein localization in a piscine species provides a novel technique that still needs to be used in other fish species.

### 10. *Xenopus tropicalis* and *laevis* (*X. tropicalis* has now been reclassified as *Silurana tropicalis*)

*Xenopus* express three isoforms of kisspeptin genes: *Kiss1a*, *Kiss1b*, and *Kiss2* and three forms of receptors: *Kiss1ra*, *Kiss1rb*, and *Kiss1r2* (64). All types of kisspeptin and *Kiss1r* mRNAs are expressed in the hypothalamus of *X. tropicalis* (64). In addition, *Kiss1a* mRNA is expressed in most tissues except the oocytes; *Kiss1b* mRNA is observed in the forebrain, hindbrain, testis, heart, lung, intestine, and eye; and *Kiss2* mRNA is expressed in the testis, heart, kidney, and liver. *Kiss1ra* mRNA is found in the forebrain, pituitary, testis, and intestine; *Kiss1rb* mRNA is expressed in the forebrain, hindbrain, testis, and liver; and *Kiss1r2* mRNA is found in the forebrain, pituitary, and heart (64). In *X. laevis*, *Kiss1* mRNA is expressed in the ventral hypothalamus (VH) and *Kiss2* in the POA and VH. *Kiss2* immunoreactive cells bodies are also restricted to the POA and VH, with fibers terminating in the median eminence (ME)—suggesting that *Kiss2* peptide may regulate GnRH release presynaptically at the level of the ME or be released to the pituitary through the hypothalamo-pituitary portal system.

### 11. Bullfrog (*Rana catesbeiana*)

The bullfrog kisspeptin receptor, *Kiss1r*, has recently been isolated, and expression has been found in the forebrain, hypothalamus, and pituitary, with weak expression in the testis and no detectable expression in the adrenal gland, heart, kidney, lung, ovary, spleen, and stomach (65).

### 12. Birds (zebra finch, *Taeniopygia guttata*)

Tobari *et al.* (66) have recently described the distribution of kisspeptin peptide in the brain of the adult male zebra finch. Using immunohistochemistry, the authors observed preliminary kisspeptin-like-immunoreactive (Kiss1-like-ir) cells in the nucleus infundibularis, which is homologous to the mammalian ARC and receives neural

inputs from song control and auditory brain regions. Kiss1-like-ir fibers and terminals are present in hypothalamic nuclei (*i.e.*, nucleus periventricularis magnocellularis, nucleus preopticus anterioris, and medialis), the telencephalon, mesencephalon, and medulla (including the pars tracheosyringalis, which controls the avian vocal organ) (66). Together, these preliminary observations support a role of kisspeptin in regulation of not only GnRH release, but also song control in the adult male zebra finch.

### 13. Other nonmammalian vertebrates

A comparative genomics approach has identified putative kisspeptin sequences in the genomes of various nonmammalian vertebrates including: fugu (*Takifugu rubripes*), tetraodon (*Tetraodon nigroviridis*), sea lamprey (*Petromyzon marinus*), three-spined stickleback (*Gasterosteus aculeatus*), elephant shark (*Callorhynchus milii*), and frog (*Xenopus laevis/tropicalis*) (50, 54, 57, 58, 65, 67). Investigations of these other fish, avian, reptilian, and amphibian species may reveal more surprises and hitherto unexpected roles for kisspeptin signaling.

## B. Mammals

A comparative genomics approach has also yielded putative kisspeptin sequences in the genomes of a wide variety of mammalian species, such as opossum (*Monodelphis domestica*) (57), lesser hedgehog (*Echinops telfair*) (58), and even platypus (54), although the majority of research on the kisspeptin signaling system in mammals has focused on “traditional” research species, such as rodents, livestock, and primates.

### 1. Rodents

The relative ease with which the genetic composition of mice can be experimentally manipulated makes them an ideal experimental animal for the study of kisspeptin signaling and understanding of the role of kisspeptin in reproductive neuroendocrinology. Other rodent models also offer unique advantages as well. We understand a great deal about the physiology of the laboratory rat; moreover, these animals have a relatively large blood volume (for a rodent), which can be readily sampled for hormone measurements. Hamsters have the virtue of being highly seasonal, which offers a special window on aspects of circadian physiology and photoperiodic signaling not afforded by other nonseasonal animals, such as the laboratory mouse and rat.

*a. Mouse (Mus musculus)*. Studies in the mouse have provided a strong foundation for our understanding of kisspeptin signaling in the mammalian brain. For instance, mutant mice with a targeted disruption of *Kiss1r* provide



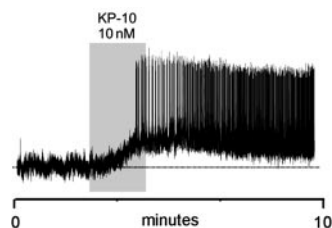

**FIG. 5.** Kisspeptin exerts a potent activational effect on GnRH neurons in adult female proestrous mice. Perforated-patch, voltage recordings from proestrous female GnRH-GFP neurons (resting membrane potential =  $-68$  mV) in the acute brain slice demonstrate a remarkably intense and prolonged activation by 10 nM kisspeptin (KP-10). [Modified with permission from Han *et al.*, 2005 (70)].

evidence that *Kiss1r* is essential for the development of the murine reproductive system (9, 68, 69). Notwithstanding the progress in our understanding of kisspeptin biology, it is astonishing that a detailed map of *Kiss1r* expression in the murine brain has yet to be published. Nevertheless, it has been shown that *Kiss1r* is expressed in GnRH neurons (70), establishing that these cells are almost certainly direct targets for kisspeptin action. Through the use of a lacZ reporter in mutant *Kiss1r*<sup>-/-</sup> mice,  $\beta$ -galactosidase activity (a marker for *Kiss1r* expression) is evident in approximately 55% of GnRH-ir neuronal cell bodies located in the preoptic area of the hypothalamus (71). Utilizing dual-label *in situ* hybridization for *GnRH* and *Kiss1r* mRNA, Han *et al.* (70) found that more than 90% of GnRH neurons express *Kiss1r* transcript, thus providing evidence that, in the mouse, kisspeptin neurons provide direct synaptic input to GnRH neurons, an idea corroborated by the finding that kisspeptin exerts a potent, direct depolarizing action on GnRH neurons (70) (Fig. 5).

A detailed distribution of *Kiss1* (transcript and protein) has been mapped in the murine hypothalamus. In this species, *Kiss1* mRNA and *Kiss1*-immunoreactive cell bodies are expressed in areas of the hypothalamus implicated in the neuroendocrine regulation of gonadotropin secretion, including the anteroventral periventricular nucleus (AVPV), the periventricular nucleus (PeN), and the ARC (72, 73) (Fig. 6). In addition, some cells expressing *Kiss1* mRNA are located in the anterodorsal preoptic nucleus, a few cells are found in the medial amygdala and bed nucleus of the stria terminalis, and none are present in the caudate nucleus, globus pallidus, nucleus accumbens, putamen, and striatum (72). Using *Kiss1* knockout (and wild-type) mice, Clarkson *et al.* (74) have recently published a comprehensive map of the distribution of *Kiss1*-ir cells in the mouse, which has helped to clarify some earlier confusion related to the nonspecificity of kisspeptin antibodies. Generally, the pattern of kisspeptin cell body distribution overlaps remarkably well with that described for *Kiss1* mRNA in the mouse, with only a few discrepancies. Immunocytochemical studies have revealed two dense populations of

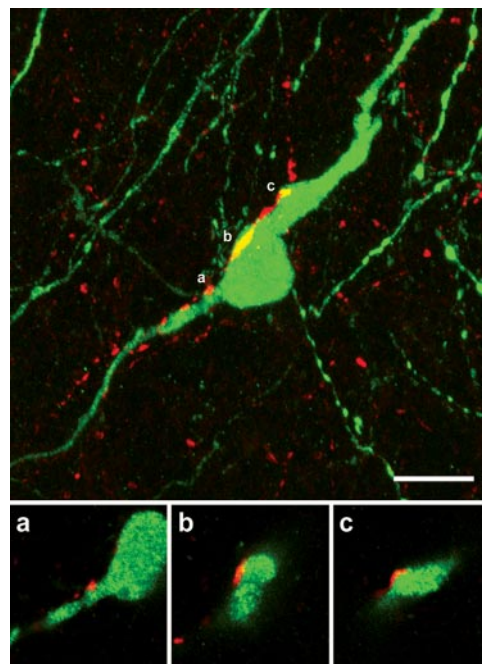

**FIG. 6.** Kisspeptin projections to GnRH neurons in adult female mice. Confocal stack of 75 images showing a single GnRH neuron (green) with kisspeptin (red) fibers surrounding and apposed to it. Single 370-nm-thick optical sections through the three regions indicated by a, b, and c of the GnRH neuron are given below to demonstrate the close apposition between kisspeptin fibers and GnRH neuron elements. Scale bar, 10  $\mu$ m. [Modified with permission from Clarkson and Herbison, 2006 (73) © The Endocrine Society].

*Kiss1*-ir cell bodies—one in the rostral continuum of the third ventricle (including the AVPV and PeN), and another in the ARC. Less-dense and more scattered populations of *Kiss1*-ir cell bodies have also been identified in the dorsomedial nucleus and posterior hypothalamus; moreover, dense concentrations of *Kiss1*-ir fibers are found within the ventral aspect of the lateral septum and along periventricular and ventral retrochiasmatic pathways, with scattered fibers appearing in the bed nucleus of the stria terminalis, medial amygdala, subfornical organ, paraventricular thalamic nucleus, the supraoptic and paraventricular nuclei, as well as the periaqueductal gray and locus coeruleus. *Kiss1*-ir fibers are absent from the ventromedial hypothalamic nucleus (VMH) and the suprachiasmatic nucleus (73, 74). Although the overall distribution of *Kiss1*-ir cells is similar between male and female mice, there is a remarkable sex difference in the number of cell bodies in the AVPV/PeN [as is the case with *Kiss1* mRNA-expressing cells in the rat (75)], with adult females exhibiting 10-fold greater numbers of kisspeptin-ir cells than males (73). (It should be noted that the specificity of the antiserum used for some of the early immunocytochemical studies was not properly validated, and thus some of the results may reflect nonspecific labeling).

**b. Hamster (Syrian, *Mesocricetus auratus*; and Siberian, *Phodopus sungorus*).** Seasonally breeding rodents, such as the “long-day” breeding hamster, are useful to study the effects of photoperiod on reproductive function. Although there is no information currently available about Kiss1r localization in the hamster, several groups have reported on the distribution of Kiss1 expression (both mRNA and peptide). Revel *et al.* (76) reported expression of both *Kiss1* mRNA and peptide product in the ARC of Syrian hamsters raised in long-day photoperiod. In the Syrian hamster, no Kiss1-ir cell bodies could be found in the AVPV (76), but in the Siberian hamster, Kiss1-ir cells have been observed in both the AVPV and the ARC, which may reflect either differences between species or the efficacy of the antiserum and/or methodology (77, 78).

**c. Rat (*Rattus norvegicus*).** Although the regulation of *Kiss1* expression in the ARC, AVPV, and PeN of the rat has been extensively investigated by *in situ* hybridization (75, 79–82), a thorough description of the distribution of *Kiss1* mRNA-expressing cells throughout the brain has not been published. The results of a broad screen for *Kiss1* mRNA by RT-PCR suggested that the *Kiss1* gene is expressed throughout the rat central nervous system, including the spinal cord, medulla and pons, midbrain, hypothalamus, and cerebral cortex, with the highest concentrations occurring in the hypothalamus, midbrain, and spinal cord (83). A more detailed description of distribution of Kiss1 neurons in the rat brain has been obtained by immunohistochemistry. Antiserum directed against human KISS-45-54 labeled Kiss1-ir neurons in the ARC, DMH, paraventricular nuclei, VMH, caudoventral lateral reticular nucleus, lateral reticular nucleus, nucleus of the solitary tract, and spinal trigeminal tract (83, 84). Additionally, Kiss1-ir cell processes were found in many other locations, including the nucleus accumbens, amygdala, thalamus, hypothalamus, bed nucleus of stria terminalis, septal nuclei, nucleus accumbens, caudate putamen, diagonal band of Broca (DBB), amygdala, zona incerta, thalamus, periaqueductal gray, raphe nuclei, lateral parabrachial nucleus, locus coeruleus, spinal trigeminal tract, rostral ventrolateral medulla, and medullary reticular nucleus (83). In particular, Kiss1-ir fibers were described in the medial preoptic area, anterior hypothalamic area, paraventricular nucleus, and ARC (83), areas of known importance in the control and regulation of gonadotropin secretion. Unfortunately, discrepancies between *in situ* hybridization results and the results of immunohistochemical studies that utilize the human KISS1-45-54 antibody raise concerns about the specificity and sensitivity of that antibody. The greatest numbers of Kiss1-ir cells in the hypothalamus were found in the DMH, but cells containing *Kiss1* mRNA

cannot be detected in the DMH by *in situ* hybridization. Furthermore, the antibody did not label Kiss1 neurons in the AVPV/PeN, a region in which the expression of *Kiss1* mRNA has been well established by *in situ* hybridization. It should also be borne in mind that the rat is similar to other species in that the expression of *Kiss1* is sexually differentiated in some areas of the brain (73, 75). This is particularly true in the AVPV, where there are about 25 times more Kiss1 cells in adult females compared with males (75).

The presence of *Kiss1r* in the brain was first reported in 1999 by Lee *et al.* (6), who used Northern blot and *in situ* hybridization and found expression in the pons, midbrain, thalamus, hypothalamus, hippocampus, amygdala, cortex, frontal cortex, and striatum, as well as peripheral organs such as the liver and intestine; no *Kiss1r* message was found in the cerebellum or kidney. A more detailed examination of *Kiss1r* transcript in the forebrain has revealed expression in the DBB, medial septum, medial preoptic area, lateral preoptic area, median preoptic nucleus, anterior hypothalamus, and lateral hypothalamus (80). To determine whether kisspeptin acts directly on GnRH neurons, Irwig *et al.* (80) used double-label *in situ* hybridization to discover that more than 75% of GnRH neurons coexpress *Kiss1r* mRNA (Fig. 7). In addition, a recent preliminary report indicates that Kiss1-ir fibers terminate in close proximity to GnRH fibers in the ME (as shown via electron microscopy), and kisspeptin causes GnRH release from ME rat tissue *in vitro* (85). A role of kisspeptin in reproductive neuroendocrine signaling outside of the brain is suggested by the finding that both Kiss1 and Kiss1r are expressed in pituitary gonadotrophs (LH $\beta$ -ir cells), as demonstrated by dual immunofluorescence (86). Thus,

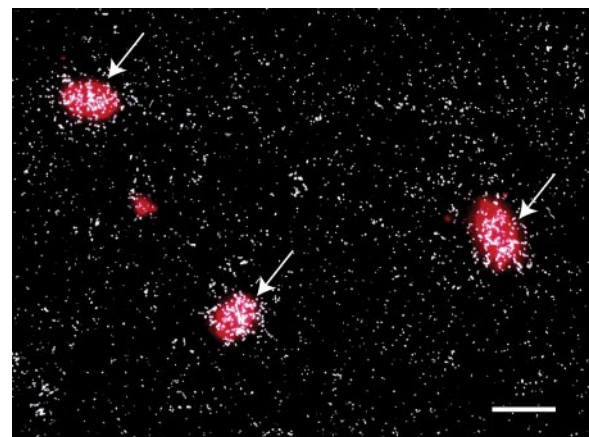

**FIG. 7.** Coexpression of GnRH mRNA with *Kiss1r* mRNA in rats. Representative photomicrograph from the medial preoptic area. GnRH-mRNA-expressing cells are fluorescent with Vector Red substrate. Clusters of silver grains (white dots) reflect the presence of *Kiss1r* mRNA. The arrows indicate GnRH neurons that coexpress *Kiss1r*. Approximately 77% of the GnRH neurons coexpress *Kiss1r* mRNA ( $n = 4$  rats). Scale bar, 20  $\mu$ m. [Reproduced with permission from Irwig *et al.*, 2004 (80) © S. Karger AG.]

kisspeptin may regulate reproductive function at both the hypothalamic and pituitary level.

## 2. Ungulates

Large, hooved farm mammals are an important economic resource, and they share many physiological characteristics with humans—and thus, have been a target of research in reproduction. Because of their large size and gentle demeanor, ungulates readily tolerate serial blood sampling to monitor hormone levels, and they offer ready access to the pituitary portal blood for the measurement of hypophysiotropic hormones (87). Knowledge about the neuroendocrine regulation of gonadotropin secretion in such animals could provide insight into how to synchronize or predict ovulation in humans, which could be useful for the treatment of infertility; moreover, such information could also be useful for the development of strategies to accelerate growth and puberty onset in these domestic species, which greatly improves the economics of commercial breeding of meat-producing species.

**a. Goat (*Capra hircus*).** A recent study in the goat suggests that kisspeptin signaling plays a vital role in the pulsatile secretion of GnRH and LH. In this species, Kiss1-ir neurons and fibers are clustered in the posterior ARC, with dense fibers appearing in the zona interna of the ME (88). Electrical recordings of multiple unit activity and simultaneous measurements of plasma levels of LH show remarkable coincidence in their ultradian profiles, suggesting that kisspeptin neurons in the ARC may be the proximate source of GnRH pulse generator activity (88)—an idea reinforced by observations in the monkey showing nearly coincident secretion of kisspeptin and GnRH in the medial basal hypothalamus (MBH) (89).

**b. Pig (*Sus domestica*).** The kisspeptin system has only recently been explored in the pig. Semiquantitative RT-PCR has identified abundant *Kiss1r* transcript in the adrenal, prostate, testis, thymus, pituitary, and hypothalamus, with weak expression in the heart and lung (90). Real-time quantitative RT-PCR of *Kiss1r* mRNA content in the hypothalamus reveals fluctuating levels throughout the estrous cycle, with lower expression levels during the follicular phase and the highest level occurring in the luteal phase (90). In comparison to cyclic sows, juvenile (anestrous) animals exhibit markedly lower hypothalamic *Kiss1r* transcript expression (90), a finding consistent with a possible role of kisspeptin in initiating puberty.

**c. Sheep (*Ovis aries*).** The ARC serves as the predominant locus for the expression of Kiss1-ir in the hypothalamus of the sheep. Additionally, Kiss1-ir is observed in the DMH, the medial preoptic area, the PeN, VMH, and the caudal

region of the paraventricular nucleus (91, 92). The highest density of Kiss1-ir varicose nerve fibers is found in the ME and the POA, as well as the ARC, PeN, VMH, and DMH (91, 92). Kiss1-ir is detected in the POA, an area known to contain numerous GnRH neurons in sheep (93). Pompolo *et al.* (91) examined whether kisspeptin colocalizes with GnRH neurons. In an initial study, they reported that GnRH cells in the DBB/POA and GnRH neurosecretory terminals of the ME contain kisspeptin-ir; however, it now appears that this finding reflects the nonspecificity of the antibody used to detect kisspeptin (from Phoenix Pharmaceuticals) (94). Using a kisspeptin-specific antibody (from Alain Caraty at the University of Tours, Tours, France) (92), Smith *et al.* (94) now report that GnRH neurons in sheep do not coexpress kisspeptin. In any case, the functional significance of Kiss1 expression in the medial POA of the sheep remains to be determined. It also appears that *Kiss1r* mRNA is expressed in ovine pituitary cell fractions enriched for gonadotropes, and low, but detectable, amounts of Kiss1-ir are found in hypophyseal portal blood, which leaves open the possibility that kisspeptin is either a hypophysiotropic/neurosecretory factor in sheep or that there are paracrine mechanisms involving kisspeptin-Kiss1r signaling within the pituitary itself (95).

**d. Horse (*Equus caballus*).** The size and distribution of Kiss1-ir cell bodies in the ARC of the Welsh pony mare (collected just after ovulation) are similar to those in the sheep (92), with additional cells localized to the DMH (96). Additionally, a scattering of Kiss1-ir cells in the horse are localized to the preoptic periventricular zone of the hypothalamus adjacent to the third ventricle. Again, there is some concern about the specificity of the antibodies used to detect kisspeptin in these reports, with possible cross-reactivity with other RFamide peptides. Kiss1-ir varicose fibers are evident from the POA to the mammillary nuclei, with a high density present in the anterior periventricular area and the ME (96, 97). Immunoreactive Kiss1 neurons are not observed in the POA; moreover, kisspeptin is not colocalized in GnRH neurons—which is consistent with the revised analysis in sheep (94, 96). However, close appositions between Kiss1-ir fibers and GnRH neurons are evident in the periventricular area, the ARC, and the ME, as analyzed by confocal microscopy (96, 97). Collectively, these results suggest that kisspeptin is involved in regulation of GnRH release at GnRH neuronal terminals at the time of the LH surge in Welsh pony mares.

## 3. Primates

The discovery that disabling mutations in the kisspeptin receptor is responsible for producing a form of hypogonadotropic hypogonadism in humans established that kisspeptin signaling is a critical feature in the devel-

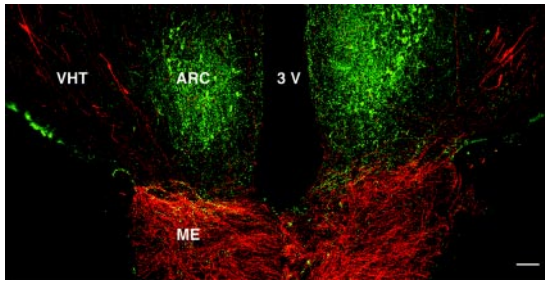

**FIG. 8.** Structural interactions between Kiss1 and GnRH neurons in the mediobasal hypothalamus of the male rhesus monkey. A confocal projection ( $\times 10$ ; 1- $\mu\text{m}$  optical sections) illustrating the distribution of kisspeptin neurons (green fluorescence, Alexa Fluor 488) in relation to the GnRH neuronal network (red fluorescence, Cy3) in a coronal section of the MBH of an agonadal male rhesus monkey aged 4 yr 3 months. Whereas kisspeptin perikarya were confined to the ARC, those of GnRH extended along the ventral hypothalamic tract (VHT), lateral to the ARC. GnRH innervation of the external zone of the ME was intense. Beaded kisspeptin axons projected to the ME, and at this anteroposterior level GnRH and kisspeptin fibers running in a near horizontal plane were found in close association. 3V, Third ventricle. Scale bar, 100  $\mu\text{m}$ . [Modified with permission from Ramaswamy *et al.*, 2008 (99) © The Endocrine Society].

opment and control of reproduction (8, 98). Performing studies in humans is often of limited scope (or precluded), based on ethical considerations; however, research performed in the nonhuman primate species, while also restricted under careful ethical guidelines, has offered some global insight into the anatomy and physiology of kisspeptin and its receptor in reproduction in primates in general, including humans.

**a. Rhesus macaque (*Macaca mulatta*).** In the rhesus monkey, Kiss1-ir perikarya have been identified in the ARC/ME, but not in the POA (including the AVPV) (99, 100); moreover, kiss1-ir is not identifiable in GnRH perikarya (99). Kiss1-ir projections are detected throughout the MBH and to a lesser extent in the POA (99), which complements the finding of *Kiss1r* in these hypothalamic areas (100, 101). Kiss1-ir axons make only infrequent contacts with GnRH cell bodies in the MBH (25–50%) (Fig. 8). However, in the ME (internal zone and to a lesser extent external layer), kisspeptin and GnRH axons are extensively and intimately associated, although only occasional axo-axonal contacts between the two have been identified (99). Nevertheless, the dual innervation of the ME by both kisspeptin and GnRH suggests that kisspeptin may regulate GnRH secretion nonsynaptically at the level of the ME. Further evidence that this might be the case comes from the observation that kisspeptin is released into the ME of the monkey in a pulsatile fashion that is synchronized with the pulsatile release of GnRH in the same region (89) (Fig. 9).

**b. Human (*Homo sapiens*).** Studies of families with idiopathic hypogonadotropic hypogonadism pointed to a mu-

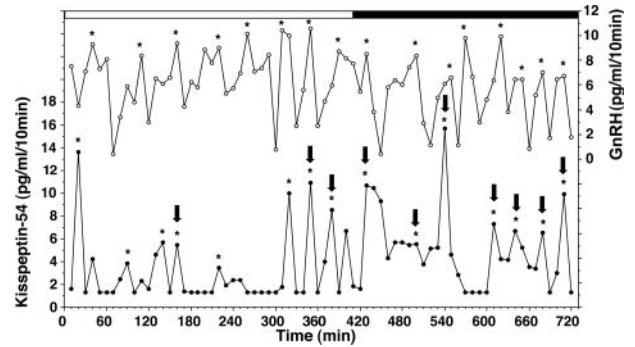

**FIG. 9.** Kisspeptin-54 release in the stalk-ME of the monkey, as assessed by microdialysis, is pulsatile. Both kisspeptin-54 (closed circle) and GnRH (open circle) were measured in the same microdialysate samples. Kisspeptin-54 and GnRH pulses, indicated by asterisks, were identified using the PULSAR algorithm. Kisspeptin-54 pulses correlated with GnRH pulses are indicated by arrows on the top of kisspeptin pulses. Lighting conditions are indicated on the top of each graph (white bar for the lights-on period and black bar for the lights-off period). [Modified with permission from Keen *et al.*, 2008 (89) © The Endocrine Society].

tation in *KISS1R*, suggesting that this receptor is essential for normal GnRH secretion and commencement of puberty. In one of the earliest papers on kisspeptin, Kotani *et al.* (2) reported abundant expression of *KISS1R* transcript (via RT-PCR) in human placenta, pituitary, spinal cord, and pancreas, with lower levels evident in other tissue, such as various brain regions, stomach, small intestine, thymus, spleen, lung, testis, kidney, and fetal liver. Transcript for the receptor's ligand (*KISS1* mRNA) has been identified in human placenta, testis, pancreas, liver, and small intestine (4). Within the hypothalamus, *KISS1* neurons are present predominantly in the infundibular nucleus (which is the homolog of the ARC in rodents and some other animals, including sheep) and in sparse and indiscrete foci in the medial preoptic area (102). No kisspeptin neurons have been reported in the rostral periventricular region of the third ventricle; however, so far the distribution of *KISS1* cell bodies has only been described in sagittal brain slices, in which periventricular cells are difficult to observe. Recently, Hrabovszky *et al.* (103) have created a preliminary detailed anatomical map of *KISS1*-ir fibers in the human hypothalamus. Axon terminals with kisspeptin-like-ir densely innervate the infundibular stalk and the lamina terminalis, with *KISS1*-ir axon varicosities found in the ventral periventricular nucleus, preoptic nuclei, paraventricular nucleus, the infundibular nucleus, and the tuberal subdivision of the supraoptic nucleus. Scattered *KISS1*-ir fibers localize in the VMH and DMH and appear to innervate the medial septum and stria terminalis. Moreover, double-immunostaining for kisspeptin and GnRH reveals overlapping networks of GnRH- and immunoreactive kisspeptin-containing axons in circumventricular organs, including the ME, and contact between immunoreactive kisspeptin-contain-

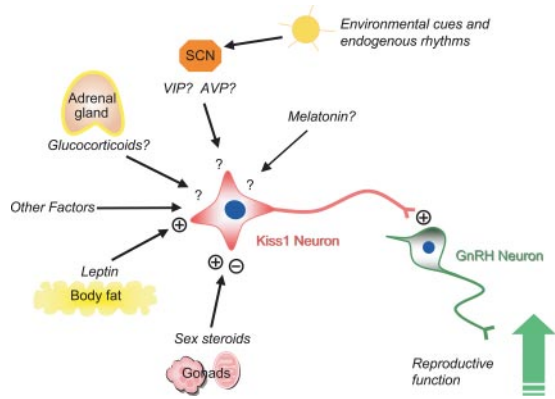

**FIG. 10.** Kisspeptin neurons may act as central processors for relaying signals from the periphery to GnRH neurons. Metabolic and environmental factors regulate reproductive function, which ensures that reproduction proceeds only when metabolic and environmental conditions are favorable. Kisspeptin stimulates GnRH secretion, and *Kiss1* mRNA is both negatively and positively regulated by sex steroids. The expression of *Kiss1* may be induced by leptin, whose plasma levels reflect the state of metabolic reserves. Kisspeptin neurons may also receive input from the hypothalamic-pituitary-adrenal axis and from environmental cues such as time of day via the SCN of the hypothalamus and day length via melatonin from the pineal gland. AVP, Arginine vasopressin; VIP, vasoactive intestinal peptide. [Modified from Dungan *et al.*, 2006 (203)].

ing axon varicosities and GnRH neuronal dendrites (103). Collectively, the finding that *KISS1* and *KISS1R* are expressed throughout the body suggest that kisspeptin plays a role not only in cell proliferation, metastasis and GnRH/gonadotropin secretion, but also in other physiological processes in various organ systems.

## V. Molecular Physiology of Kiss1 Neurons

The molecular constitution of *Kiss1* neurons is beginning to unfold, but much is yet to be discovered about their

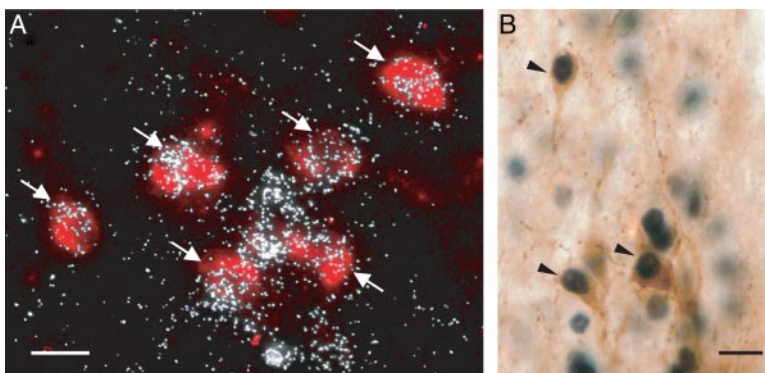

**FIG. 11.** Kisspeptin neurons express  $ER\alpha$ . A, Representative photomicrograph showing coexpression of *Kiss1* mRNA with  $ER\alpha$  in the AVPV of the female mouse. *Kiss1* mRNA-expressing cells were visualized with Vector Red substrate, and  $ER\alpha$  was marked by the presence of clusters of silver grains (white dots). Arrows indicate *Kiss1* neurons that coexpress  $ER\alpha$ . Scale bar, 20  $\mu$ m. B, Dual-label immunocytochemistry showing kisspeptin neurons (brown) with  $ER\alpha$ -immunoreactive nuclei (black) in the AVPV of the female mouse. Arrowheads indicate dual-labeled cells. Scale bar, 10  $\mu$ m. [Modified with permission from Smith *et al.*, 2005 (104), © The Endocrine Society, and Clarkson *et al.*, 2008 (106)].

molecular and morphological features. Control of *Kiss1* neurons emanates from a variety of sources, including steroid hormone feedback, metabolic signals, and photoperiodic cues (Fig. 10). Consistent with their role as mediators of steroid feedback, most *Kiss1* neurons express  $\alpha$ -estrogen receptors ( $ER\alpha$ ) (79, 82, 92, 104–106) (Fig. 11),  $ER\beta$  (82), and progesterone receptors (PR) (106, 107) (Fig. 12). About 40% of *Kiss1*-expressing neurons in the ARC of the mouse express the mRNA for the active form of the leptin receptor (*Ob-Rb*) (108), thus providing a potential link between nutrition and reproduction. Numerous studies indicate that *Kiss1* neurons are regulated by photoperiod (48, 52, 76, 77, 94, 107), but many questions remain unanswered with respect to the pathways (direct/indirect) and intermediates [*e.g.*, melatonin (109)] by which photoperiodic cues are relayed to kisspeptin neurons.

An important study by Goodman *et al.* (110) describes a subpopulation of ovine kisspeptin neurons in the ARC that coexpress dynorphin A and neurokinin B (NKB), and quite likely  $ER\alpha$  and PR, because these steroid hormone receptors are expressed in nearly all dynorphin and NKB neurons in the ARC (111, 112) (Fig. 13). This is the first study to provide direct evidence that kisspeptin neurons contain additional neuropeptides involved in reproductive control. Other investigations provide implicit evidence for a similar coexpression phenomenon in other species, including the rat, mouse, and human. For example, there is extensive colocalization of NKB and dynorphin in the ARC of the rat (113). Because these neurons all express  $ER\alpha$  (113), we can reasonably infer coexpression of kisspeptin, NKB, and dynorphin in the ARC of that species as well. Rometo *et al.* (102) observed similar distribution and morphology of NKB- and kisspeptin-containing neurons in the infundibular (ARC) nucleus of postmenopausal women, suggesting the expression of NKB and kisspeptin in the same cells. Moreover, approximately half of glutamatergic neurons in the ARC of sheep express  $ER\alpha$  (114), indicating the presence of a discrete population of kisspeptin/dynorphin/NKB/glutamate estrogen-responsive neurons in the ARC.

Navarro and his colleagues (104, 115) have verified that kisspeptin, NKB, and dynorphin are all colocalized in cells of the ARC in the mouse, where all three of these neuropeptides are regulated by estradiol. Moreover, in this species kisspeptin neurons in the ARC also express the cognate receptors for NKB and dynorphin (*i.e.*, NK3 and  $\kappa$ -opiate receptor, respectively) (115), suggesting the existence of aut synaptic contacts among kisspeptin/dynorphin/NKB neurons in this region. Indeed,

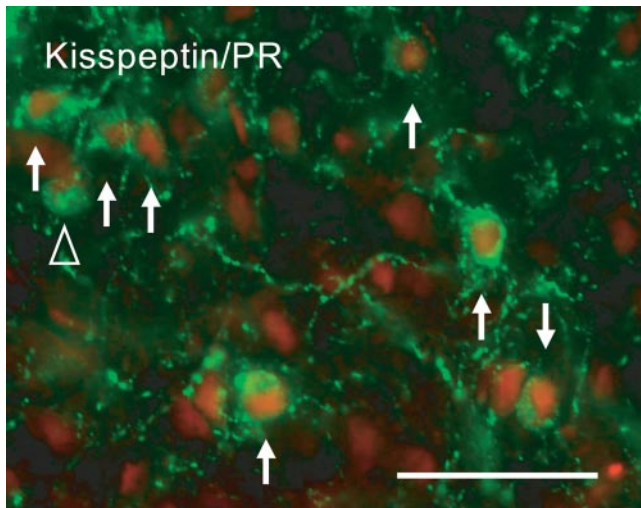

**FIG. 12.** Expression of PR in Kiss1 neurons. Photomicrograph of cells costaining for kisspeptin (green) and PR (red) in the ARC of the ewe brain. Arrows indicate cells containing both kisspeptin and PR. The open arrowhead indicates a kisspeptin-positive PR-negative cell. Scale bar, 50  $\mu\text{m}$ . [Modified with permission from Smith *et al.*, 2007 (107) © The Endocrine Society].

a preliminary report from Inyushkin *et al.* (116) testifies to the appearance of Kiss1-ir synaptic contacts on Kiss1 neurons in the ARC—reinforcing the notion of an autodynamically regulated network of kisspeptin neurons in this area. Furthermore, both symmetric and asymmetric synapses were observed (116), suggesting that Kiss1 neurons exert both stimulatory and inhibitory influences on themselves and one another. A recent study by Navarro *et al.* (115) demonstrates that NKB agonists inhibit LH secretion in ovariectomized mice; moreover, they demonstrate that mice bearing targeted deletions of either the *dynorphin* or  *$\kappa$ -opioid receptor* gene show a diminished post-castration rise in LH, implying that NKB and dynorphin signaling play key roles in the regulation of GnRH/LH secretion. Together, these observations suggest that kisspeptin, dynorphin, NKB (and perhaps glutamate) par-

ticipate in the regulation of pulsatile GnRH secretion. Indeed, Navarro *et al.* (115) propose a model in which dynorphin and NKB act autodynamically on kisspeptin neurons (directly and/or indirectly) to generate discrete pulses of kisspeptin, which in turn drives pulsatile GnRH and LH secretion. This idea is consistent with the observations of Keen *et al.* (89), showing apparent coincidence of pulsatile kisspeptin and GnRH secretion, as measured in the ME of the monkey. It is likely that other peptidergic systems and classical neurotransmitters, such as glutamate and  $\gamma$ -aminobutyric acid, also play important roles in the regulation of kisspeptin activity in the ARC—this subject is ripe for investigation (117).

In the AVPV, the story is different from the ARC. Kisspeptin neurons in the AVPV express neither dynorphin nor NKB in any species studied to date. However, in the mouse, kisspeptin neurons in the AVPV appear to co-express tyrosine hydroxylase (118), suggesting that these cells may be dopaminergic—although this does not appear to be the case in the rat, where few, if any, kisspeptin neurons in the AVPV appear to express tyrosine hydroxylase (75). The differential expression of various cotransmitters with kisspeptin (ARC *vs.* AVPV) makes a compelling case that these two populations of “kisspeptin” neurons are phenotypically unique—not only in their molecular fingerprint, but also in their physiological function.

Little is known about the afferent inputs to Kiss1 neurons (besides possible autodynamically processes). We can surmise that Kiss1 neurons in the AVPV of the rodent are likely to receive afferent input from the suprachiasmatic nucleus (SCN) because that region projects to the AVPV and is involved in the timing of the LH surge (119) (Fig. 10). The molecular identity of the neurotransmitters involved is currently unknown, but they could be arginine vasopressin or vasoactive intestinal peptide because these are the major efferent projections from the SCN (119, 120); however, this remains to be investigated.

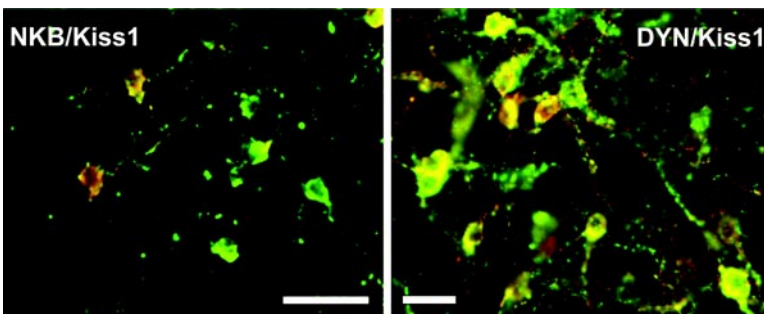

**FIG. 13.** Coexpression of NKB/Kiss1 and dynorphin (DYN)/Kiss1 in the middle ARC of the ewe. Overlay of red (Kiss1 neurons) and green (NKB) fluorescent images (left; scale bar, 50  $\mu\text{m}$ ) and overlay of red (DYN) and green (Kiss1 neurons) fluorescent images (right; scale bar, 20  $\mu\text{m}$ ), illustrating colocalization of kisspeptin with NKB and DYN with kisspeptin, respectively. Double-labeling appears brown. [Modified with permission from Goodman *et al.*, 2007 (110) © The Endocrine Society].

## VI. Comparative Physiology

Animals employ various strategies to optimize reproductive success, including timing reproduction to the ideal season of birth (*e.g.*, fall breeding for sheep and spring breeding for hamsters) and timing the event of ovulation to occur within a narrow window to maximize the opportunity of successful mating (*e.g.*, just before the onset of darkness and activity in the rat and nonphotoperiodic mechanisms in the primate). These different strategies are reflected in unique and diverse organization of Kiss1 cir-

cuitry in the brain across species. Some aspects of kisspeptin anatomy and physiology are highly conserved across species, such as the stimulatory effect of kisspeptin on GnRH and the inhibitory action of estradiol in *Kiss1* gene expression in the MBH. However, other aspects of *Kiss1* anatomy and physiology are unique to particular species—such as the mechanisms that govern the preovulatory surge of GnRH/LH. We will try to identify those aspects of kisspeptin signaling in the brain that are widely shared among species and those that are unique to certain animal groups.

### A. Direct and indirect effects of kisspeptin on GnRH neurons

Several major lines of evidence suggest that kisspeptin signals directly to GnRH neurons (121). First, the majority of GnRH neurons express *Kiss1r* (46, 70, 71, 80). Second, kisspeptin-ir fibers are found in close association with GnRH neurons (42, 73, 94, 96). Third, kisspeptin can act directly to depolarize and increase firing rates of GnRH neurons *in vitro* (17, 19, 70, 122–125). It should be noted that although kisspeptin may act through traditional synaptic mechanisms to stimulate GnRH secretion, it may also act directly in a nonsynaptic manner, particularly in the ME (91, 92, 96, 99, 126). In addition to acting directly on GnRH neurons, there is growing evidence to suggest that kisspeptin also acts on intermediary neurons, such as GABAergic cells, to regulate GnRH secretion (123, 127).

### B. Pituitary effects

When kisspeptin acts at the level of the hypothalamus to increase GnRH secretion, it produces an increase in LH release from the pituitary. However, some studies suggest that kisspeptin may also act at the level of the pituitary to evoke LH secretion through a direct action on the gonadotropes. A detailed description of the action of kisspeptin on the pituitary has recently been reviewed (128). Indeed, it would appear that both *Kiss1* and *Kiss1r* are expressed in the pituitary, specifically in gonadotropes, and are differentially regulated by sex steroids (42, 86, 95, 129). The presence of a functional kisspeptin receptor in the pituitary, combined with the finding that kisspeptin is released in ovine hypophyseal portal blood, suggests kisspeptin action at the level of the pituitary to modulate gonadotropin secretion (95). This proposition is supported by *in vitro* studies demonstrating a stimulatory increase in gonadotropin secretion from pituitary fragments or cells treated with kisspeptin (129–131). Taken together, these findings would argue for a dual action of kisspeptin, at the pituitary and hypothalamus, with the collective outcome of increased gonadotropin secretion.

However, there is controversy about this conclusion, and it remains unclear whether kisspeptin acts as a true

hypophysiotropic factor (*i.e.*, released from the brain and transported via the portal circulation to act on gonadotropes) to regulate LH secretion. Although kisspeptin can be measured in hypophyseal portal blood, levels are similarly low in both ovariectomized ewes and ewes treated with estrogen to induce an LH surge (95), suggesting that the action of kisspeptin at the pituitary does not greatly affect the release of LH. Utilizing the hypothalamo-pituitary disconnection sheep model, Smith *et al.* (95) examined the *in vivo* relevance of kisspeptin at the level of the pituitary. In this model, kisspeptin treatment had no effect on LH secretion (during steady-state conditions and the estrogen-induced surge) (95), indicating that any effect of kisspeptin on LH secretion occurs upstream of the pituitary. Furthermore, a GnRH antagonist blocks the kisspeptin-induced increase in LH, again suggestive of (but not proving) a supra-pituitary action of kisspeptin (72, 80) (Fig. 14). Thus, whereas some evidence supports a role of kisspeptin action at the pituitary, other findings would suggest otherwise; further experiments are necessary to identify the role of kisspeptin at the pituitary.

### C. Continuous vs. pulsatile exposure to kisspeptin

After an initial stimulation, a continuous (chronic) exposure of the pituitary to GnRH (or agonists) eventually causes suppression of gonadotropin secretion (132) through down-regulation and sensitization of the GnRH receptors (133–136). Because kisspeptin is known to activate the brain-gonadotrope axis, several groups have examined whether a constant infusion of kisspeptin would produce the same inhibitory effect on gonadotropin secretion as GnRH. Indeed, continuous delivery of exogenous kisspeptin appears to desensitize *Kiss1r*, resulting in decreased LH secretion in agonadal juvenile and adult male monkeys and testicular degeneration in adult male rats (137–139). In contrast, repeated peripheral injections of kisspeptin elicit unrestrained LH pulses in male rats and monkeys (140, 141), implying that the efficacy of kisspep-

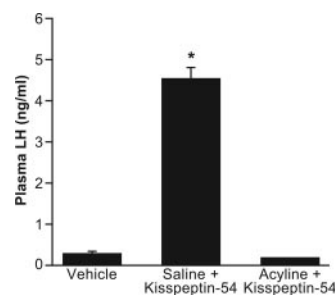

**FIG. 14.** The GnRH antagonist, acyline, blocks the effects of kisspeptin-54 on plasma LH in the mouse. Kisspeptin-54 (50 pmol) and vehicle were administered into the lateral ventricle. Pretreatment with the GnRH antagonist, acyline (50  $\mu$ g) or saline was given sc. \*,  $P < 0.001$  saline + kisspeptin-54 vs. all other treatments. [Modified with permission from Gottsch *et al.*, 2004 (72) © The Endocrine Society].

tin to drive LH secretion depends on its pulsatile nature, much like for GnRH. Interestingly, sustained (30 or 48 h) iv kisspeptin treatment was effective in seasonally acyclic ewes (anestrous season), resulting in ovulation in 80% of animals (compared with 20% controls) (142). It is not clear whether this finding reflects a difference in the way sheep respond to continuous exposure to kisspeptin compared with other species or is due to differences between studies in the dose and mode of kisspeptin administration. Because desensitization could have a major impact on the efficacy of kisspeptin analogs and antagonists when used as contraceptives or to treat reproductive disorders, a better understanding of this phenomenon is needed.

#### D. Negative feedback action of sex steroids on *Kiss1* gene expression in ARC

The ability of testosterone to act at the level of the hypothalamus to suppress GnRH and thereby regulate gonadotropin secretion and testicular function in the male is a classic example of negative feedback. Because GnRH neurons appear to lack both the androgen receptor (AR) and ER $\alpha$  (in either sex), some intermediary neuronal system is thought to indirectly relay the feedback signal from the gonad to GnRH neurons. Recent observations suggest that kisspeptin neurons may represent an important component of this negative feedback loop (Fig. 15). After castration in mice, rats, hamsters, and monkeys, levels of *Kiss1* mRNA increase dramatically in the mediobasal hypothalamus, specifically the ARC; moreover, this effect can be reversed with sex steroid replacement (e.g., with testosterone, estradiol, or dihydrotestosterone) (76, 80, 100, 105, 143). A castration-induced increase in *Kiss1*

expression in the ARC coincides with the increase in GnRH and gonadotropin secretion that results after removal of the negative feedback action of testosterone (i.e., after castration) (105). The postcastration rise in LH can be blocked by kisspeptin antagonists in the male rat and mouse (43). Kisspeptin neurons in the ARC of the mouse appear to express the AR and ER $\alpha$  (105), reflecting that they are direct targets for the action of sex steroids; moreover, studies of male mice with null mutations in the ER (ER $\alpha$ KOs) and hypomorphic alleles of the AR implicate both ER $\alpha$ - and AR-dependent regulation of *Kiss1* gene expression in the ARC (105). Taken together, these observations provide convincing evidence that Kiss1/Kiss1r signaling (in the ARC) mediates the negative feedback regulation of GnRH/LH secretion—at least in the male.

In the female mammal, during most days of the estrous (and menstrual) cycle, the negative feedback control of gonadotropin secretion predominates, and a relatively low plasma level of gonadal steroids restrains GnRH and LH secretion. Kisspeptin neurons appear to play a key role in the negative feedback action of estradiol in the female (Fig. 15), as they do for testosterone in the male. The expression of *Kiss1* mRNA in the ARC changes as a function of the estrous cycle in the rat, with levels reaching nadirs at or around the time when estradiol levels are highest (82) (Fig. 16). Ovariectomy causes an increase in hypothalamic expression of *Kiss1* mRNA in the ARC of rodents, sheep, and monkeys (94, 102, 104, 107, 143–145). The increase in expression of *Kiss1* is reversible upon treatment with

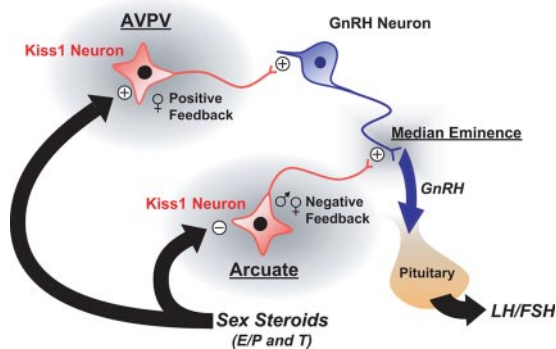

**FIG. 15.** A schematic representation of our current understanding of Kiss1 signaling in the forebrain of the mouse. Kisspeptin stimulates GnRH secretion by a direct effect on GnRH neurons, most of which express the kisspeptin receptor, Kiss1r. Neurons that express *Kiss1* mRNA reside in the AVPV and the ARC (arcuate). Kiss1 neurons in the ARC appear to be involved in the negative feedback regulation of GnRH/LH by sex steroids. The expression of *Kiss1* mRNA in the arcuate is inhibited by estradiol (E), progesterone (P), and testosterone (T). These same hormones induce *Kiss1* mRNA expression in the AVPV, where Kiss1 neurons are thought to be involved in the positive feedback regulation of GnRH/LH. [Modified with permission from Gottsch et al., 2006 (204) © Elsevier].

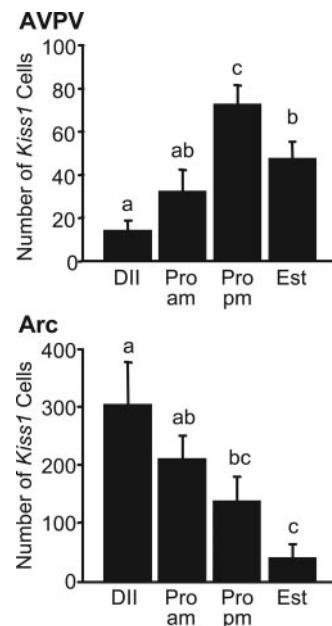

**FIG. 16.** *Kiss1* expression in the AVPV and ARC over the estrous cycle of the rat. Values without common notations (a, b, c) differ significantly ( $P < 0.05$ ). Values are the mean  $\pm$  SEM. DII, Diestrus; Pro am, proestrus 2 h after lights on; Pro pm, proestrus 1 h before lights off; Est, estrus. [From Smith et al., 2006 (82)].



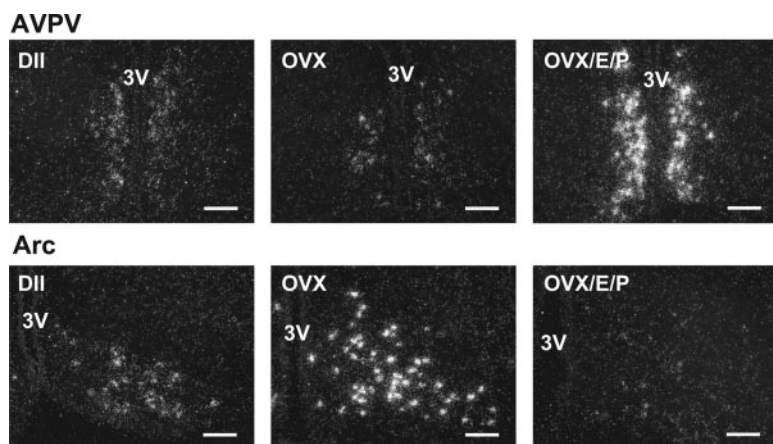

**FIG. 17.** Dark-field photomicrographs showing *Kiss1* mRNA-expressing cells (as reflected by the presence of white clusters of silver grains) in representative sections of the AVPV and ARC from diestrus (DII), ovariectomized (OVX) and ovariectomized/estradiol/progesterone (OVX/E/P)-treated female rats. 3V, Third ventricle. Scale bars, 100  $\mu$ m. [From Smith *et al.*, 2006 (82)].

estradiol (82, 94, 102, 104, 107, 143, 144) (Fig. 17). Finally, female mice bearing targeted deletions of *Kiss1r* do not show a postcastration rise in LH— despite exhibiting a dramatic increase in the expression of *Kiss1* mRNA (144). These observations suggest that kisspeptin neurons in the ARC of both the male and female provide tonic drive to GnRH neuronal activity, which is modulated by the negative feedback effects of gonadal steroids (testosterone in the male and estradiol in the female). However, the situation with kisspeptin neurons in the AVPV (of the rodent) is different.

#### E. Circadian signals and positive feedback action of estradiol on *Kiss1* gene expression in AVPV

Early on proestrus in rodents (or late in the follicular phase of the menstrual cycle in primates), the rising tide of estradiol in the plasma triggers a surge of GnRH and LH secretion, which induces ovulation. In rodents, this so-called positive feedback effect of estradiol appears to involve estradiol-sensitive neurons in the AVPV, which act directly on GnRH neurons to stimulate the preovulatory surge of GnRH and thus LH (146, 147). Nearly all kisspeptin cells in the AVPV of the female rodent express ER $\alpha$  (104); moreover, the AVPV is a sexually dimorphic nucleus, with sexually differentiated expression of tyrosine hydroxylase (148), *Kiss1* (75), neurotensin (149), and other genes.

Kisspeptin neurons in the AVPV of rodents appear to play a central role in relaying the positive feedback effects of estradiol to GnRH neurons. First, treatment with a kisspeptin antiserum to block kisspeptin signaling completely abolishes the LH surge in female rats (42, 79) (Fig. 3). Second, in the mouse, the expression of *Kiss1* mRNA in the AVPV is dramatically induced by estradiol (104, 144). Third, in the rat, the expression of *Kiss1* mRNA in the AVPV peaks at a time coincident with the GnRH/LH surge, and *Kiss1* neurons in the AVPV show Fos induction at precisely this time (79, 82)

(Fig. 18). Fourth, a population of rodent ER $\alpha$ -positive neurons makes direct synaptic contact with GnRH neurons (146, 147), and these neurons are likely to be *Kiss1* neurons (104). Finally, a report by Clarkson *et al.* (106) showed that whereas normal wild-type mice that have been ovariectomized and treated with both estradiol and progesterone show a clear LH surge, mice bearing targeted deletions in *Kiss1r* appear to lack this capacity. Moreover, in this same study, approximately 50% of GnRH neurons in wild-type mice showed Fos expression coincident with the LH surge, whereas none of the mutant animals showed evidence of Fos expression at this same time (106). Together, these observations imply that activation of kisspeptin neurons and their signaling to GnRH neurons is a prerequisite for generating the estradiol/progesterone-induced GnRH/LH surge in the female mouse.

Despite the compelling argument that kisspeptin signaling is inextricably linked to the preovulatory surge of GnRH and LH, there are two lines of evidence that add caution to this conclusion. First, a study by Dungan *et al.* (144) revealed that in another, independently produced line of *Kiss1r*-knockout (*GPR54* knockout) mice, ovariectomized knockout females treated with estradiol (alone) retain the capacity to elicit a GnRH/LH surge and Fos induction in GnRH neurons—virtually identical to wild-type controls, indicating kisspeptin signaling in these mice with this paradigm is not an absolute prerequisite for induction of the GnRH/LH surge. Although Clarkson *et al.* (106) and Dungan *et al.* (144) have provided evidence for having produced a complete knockout of the *Kiss1r* gene, the method these groups used to generate a GnRH/LH surge in ovariectomized animals differed, which might explain their different results (and conclusions). The protocol used to produce a surge in the Dungan *et al.* (144) study involved sustained treatment with estradiol alone (which produces a diurnal GnRH/LH surge that persists for many days), whereas that used by Clarkson *et al.* (106) involved a combination of estradiol and progesterone to generate a single (nonreplicating) surge (which produces a single GnRH/LH surge, instead of a daily event). In any case, it is conceivable that these two methods activate different pathways to produce the GnRH/LH surge, which could involve a differential dependency on kisspeptin signaling. It is interesting to note that the estradiol alone treatment paradigm generates a daily surge of *Kiss1* gene expression and *c-fos* expression in kisspeptin neurons in the AVPV, which is accompanied by an LH surge even in constant darkness—presumably reflecting circadian activation by the suprachiasmatic nucleus (150).

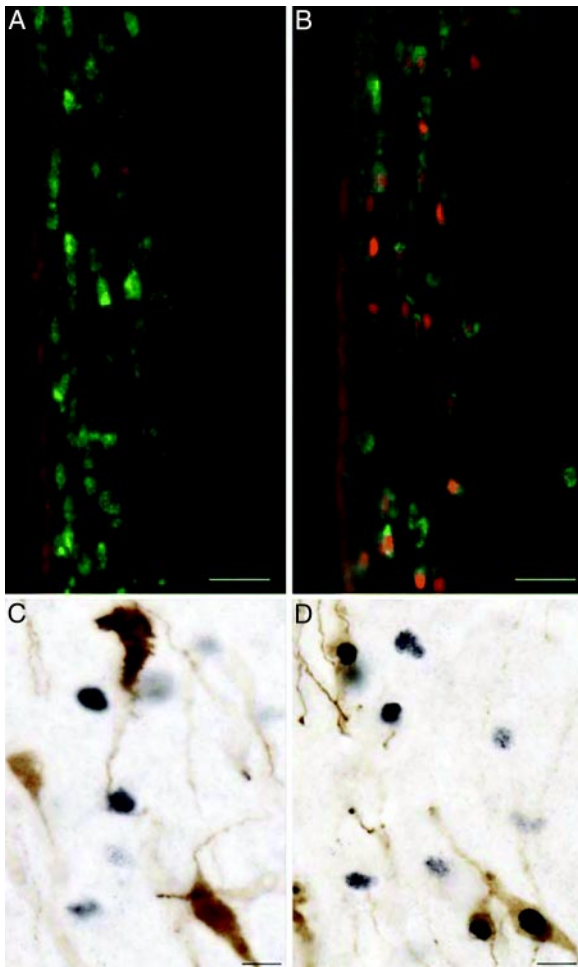

**FIG. 18.** Fos expression in the AVPV of the rat before and during an LH surge. A and B, Photomicrographs showing Kiss1 neurons (green) in the AVPV on diestrus II (A) and proestrus (B), with the induction of Fos (red) in Kiss1 neurons on the afternoon of proestrus (compare A and B). Scale bars, 25  $\mu\text{m}$ . C and D, Photomicrographs showing GnRH neurons (brown) and Fos (black) on diestrus II (C) and their coexpression on the afternoon of proestrus (D). Scale bars, 10  $\mu\text{m}$ . [From Smith et al., 2006 (82)].

A second set of observations from Seminara and her colleagues also argues that kisspeptin signaling is not an absolute prerequisite to sustain some degree of activity of the brain-gonadotropin axis. Their studies show that a subset of animals in another independently derived line of *Kiss1r* knockout mice and a separate line of *Kiss1* knockout mice retain the capacity to show some degree of gonadotropin secretion and ovarian cyclicity (based on vaginal smears)—albeit lacking regularity and evidence of ovulation (68, 151). Moreover, patients with various mutations in *KISS1R* show variable reproductive phenotypes (even those with an identical mutation), which in some cases indicates a modest level of gonadotropin secretion (low levels of pulsatile LH secretion) and gonadal activity (8, 152, 153), although we cannot discount the possibility that these mutations do not completely disable the kisspeptin receptor and thus kisspeptin signaling to GnRH

neurons. Together, these observations would suggest that either some of the various mutations are not fully disabling to the kisspeptin receptor and signaling pathway or that GnRH secretion can occur at low levels independently of trophic activation by kisspeptin. This could cause some degree of GnRH/gonadotropin-dependent reproductive activity to persist in many animal models in which kisspeptin signaling would appear to be inactivated (or severely compromised), whereas in other models, inactivation leads to complete reproductive failure.

How might the brain-gonadotropin axis retain some activity even when kisspeptin signaling has been completely disabled? First, there may be a compensatory process that occurs during development, which drives GnRH secretion and affects a partial rescue of the reproductive phenotype. Second, there may be redundancy in the circuits that drive the GnRH/LH surge, which could partially rescue the phenotype, such as the neurotensin pathway in the AVPV (154). Third, the activity of one of the kisspeptin cotransmitters could sustain some level of GnRH activity (e.g., perhaps glutamate or dopamine produced by Kiss1 cells in the AVPV). These ideas remain untested.

Although a strong case can be made that the negative feedback effect of estradiol and testosterone on GnRH secretion is mediated by kisspeptin/dynorphin/NKB-producing neurons in the ARC of the mammals studied to date, the same unifying principle does not apply in the case of positive feedback. In the rodent, the ability of estradiol to evoke a GnRH/LH surge would appear to be mediated by kisspeptin neurons in the AVPV. However, in the ewe and primates, there is no homolog of the AVPV as found in the rodent. In the ewe, the positive feedback effects of estradiol appear to be mediated by kisspeptin neurons in the rostral region of the mediobasal hypothalamus, as evidenced by the up-regulation of *Kiss1* mRNA in the rostral ARC during the preovulatory period (155); however, we lack a fundamental understanding of how (in the ewe) kisspeptin neurons in the ARC mediate both negative and positive feedback. As we learn more about the molecular fingerprint of Kiss1 neurons in the ARC of the sheep, it may turn out that there are several “phenotypes” of Kiss1 neurons comprised within the MBH—one involved in negative feedback, and another involved in positive feedback. At the moment, this is a matter of pure conjecture. In the case of primate species (e.g., monkey and human), we know that the neuroendocrine mechanisms that generate the preovulatory GnRH/LH surge are also different from the rodent (and the ewe, for that matter; see Ref. 156). Unfortunately, we currently have no insight into the role of kisspeptin in generating the GnRH/LH surge in any primate species. Taken together, these observations suggest site- and species-specific roles for kisspeptin neurons in mediating steroid hormone signaling

to GnRH neurons—and should serve as an open invitation for further investigation.

#### F. Differential regulation of *Kiss1* gene expression by estradiol in the brain

The molecular mechanism by which estradiol differentially regulates *Kiss1* in the ARC and AVPV is unknown. ER $\alpha$  can exert a multiplicity of cellular effects, depending upon its interactions with various signaling pathways. The “classic” pathway involves estradiol binding to estrogen response elements (EREs) in the gene promoter to alter transcription (ERE-dependent). An alternative ER $\alpha$  signaling pathway involves ERE-independent (nonclassical) mechanisms, which include protein-protein interactions at heterologous response elements, such as SP-1 and AP-1 sites. Recently, a line of mice has been developed that permits distinguishing between ERE-dependent and -independent signaling pathways *in vivo* (157). In these nonclassical ER $\alpha$  knock-in mice, a single allele of a mutated ER $\alpha$  (ER $\alpha^{AA}$ ) confers nonclassical ER $\alpha$  signaling in the absence of classical signaling (ER $\alpha^{AA/-}$ ). Analysis of these mice indicates that ERE-independent signaling is sufficient for negative feedback regulation of LH, whereas positive feedback requires ERE-mediated transcriptional regulation of target genes. Recent preliminary studies comparing levels of *Kiss1* mRNA in ER $\alpha^{+/+}$ , ER $\alpha^{-/-}$ , and ER $\alpha^{AA/-}$  adult female mice demonstrate that the effect of estradiol on the expression of *Kiss1* is mediated by classical ERE pathways in the AVPV and by nonclassical pathways in the ARC (158). Thus, the same mechanisms that mediate the positive and negative feedback effects of estradiol on gonadotropin secretion also appear to mediate the effects of estradiol on *Kiss1* expression in the murine AVPV and ARC, respectively. This is consistent with the argument that kisspeptin neurons in the ARC and AVPV of the rodent participate in the negative and positive feedback regulation of gonadotropin secretion. Furthermore, this same study found that estradiol inhibits dynorphin gene expression in the ARC through a classical ER $\alpha$  pathway (158). Because *Kiss1* and dynorphin are expressed in the same population of neurons in the ARC, these results demonstrate that the estradiol-dependent regulation of coexpressed genes in single neurons can occur by different ER $\alpha$  signaling mechanisms.

#### G. Kisspeptin in pregnancy, lactation, and aging

In addition to the menstrual (or estrous) cycle in which kisspeptin may participate, an adult female can experience a variety of functional reproductive states. In pregnancy, for example, rats maintain LH and FSH secretory responses to kisspeptin and exhibit an increase in hypothalamic *Kiss1* gene expression (159). Moreover, a dramatic increase in circulating levels of kisspeptin occurs during

pregnancy in humans (160). This circulating kisspeptin is derived mainly from the placenta, which expresses both *Kiss1* and *Kiss1r* (1, 3, 4). Concentrated in the syncytiotrophoblasts, kisspeptin may be involved in the regulation of trophoblast invasion during the first trimester, when plasma kisspeptin is elevated (160). The finding that kisspeptin suppresses the motility, invasion, and growth of *Kiss1r*-transfected CHO cells *in vitro* (161) further supports a role of kisspeptin in trophoblast invasion. But, high levels of circulating plasma kisspeptin suggest kisspeptin may have other roles during pregnancy and raises a number of questions. Might continuous high levels of plasma kisspeptin “down-regulate” the hypothalamic-pituitary gonadal axis and be responsible in part for the cessation of reproductive cycles in the female? Could “abnormal” levels of kisspeptin somehow contribute to problems associated with pregnancy, such as gestational diabetes, pre-eclampsia, or preterm labor? Clearly, there are many areas to explore regarding the role(s) of kisspeptin in pregnancy.

Despite maintaining their LH and FSH responsiveness to kisspeptin (159), lactating rats have reduced expression of *Kiss1* mRNA in the ARC region and *Kiss1r* mRNA expression in the AVPV (162), providing a possible mechanism to explain the reduction of LH secretion during lactation. The suckling stimulus appears to be responsible for the suppression of *Kiss1* mRNA expression in the ARC (162), and it is interesting to note that neural inputs derived from the suckling stimulus activate neurons projecting to the ARC (163). Because lactation is associated with low levels of estradiol (which would ordinarily increase *Kiss1* expression in the ARC), it is remarkable that the expression of *Kiss1* mRNA in the ARC is so low during lactation (162). What is the physiological significance of having suppressed levels of *Kiss1* in the ARC? Perhaps suckling-induced reduction in kisspeptin and *Kiss1r* represents a mechanism whereby estrous and menstrual cycles are shut down during lactation (lactational amenorrhea).

Aging takes a toll on the reproductive system—most obviously in females (164). This becomes reflected in disrupted cycles and eventually constant estrus (or diestrus) in rodents and menopause in primates. This does not appear to be due to a defect in the ARC, but a serious defect in the AVPV, because preliminary data indicate that declining expression of kisspeptin in the AVPV occurs in middle-aged female rats, reducing the stimulatory drive of kisspeptin to GnRH neurons and delaying the estradiol-mediated GnRH/LH surge (165). Of interest, menopause in women is associated with hypertrophy of *Kiss1* neurons and increased expression of *Kiss1* mRNA in the MBH (infundibular nucleus), perhaps reflecting reduced circulating levels of estradiol and the reduction of negative feedback (102, 145). Although kisspeptin appears to be a rel-

evant signaling hormone in reproductive aging, its precise role is yet to be defined.

#### H. Metabolic regulation

Evidence suggests that the activity of *Kiss1* neurons is influenced by body weight, nutrition, metabolism, and hormonal signals (166, 167, 205). As noted previously, a significant fraction of *Kiss1* neurons in the ARC express the leptin receptor, *Ob-Rb* (108). Moreover, *Kiss1* mRNA is significantly reduced in obese *ob/ob* mice compared with wild-type controls (108). In other experimental models in which the leptin receptor is dysfunctional as a result of a mutation, such as the obese, diabetic Zucker rat (*fa/fa*), reproduction is also impaired, but treatment with exogenous kisspeptin can induce an acute release of LH in this model, suggesting that the kisspeptin signaling might be responsible for their dysfunction (168). In rats with streptozotocin-induced diabetes, hypothalamic levels of *Kiss1* mRNA are decreased, which is accompanied by reduced circulating levels of gonadotropins; however, the hypogonadotropic state associated with streptozotocin-induced diabetes can be rescued by kisspeptin administration, implying that reduced kisspeptin signaling may explain the reproductive failure that often accompanies diabetes (169, 170). In states of undernutrition (or fasting), which reduce gonadotropin secretion as well as the expression of *Kiss1*, exogenous kisspeptin administration can reinstate reproductive function (168, 171, 172). However, it is conceivable that the apparent rescue of the reproductive axis associated with poor nutrition or diabetes that occurs with kisspeptin simply reflects its ability to activate GnRH neurons downstream of the mechanisms that are impaired in these altered metabolic states. Collectively, these findings point to a potentially important role of *Kiss1* neurons in regulation of reproduction by metabolic factors.

#### I. Seasonality

The role of kisspeptin in the photoperiodic control of reproduction has been examined in several recent reviews (173–175). Seasonal breeders, such as hamsters and sheep, restrict fertility to a particular time of year to ensure the birth of offspring during favorable environmental conditions. Photoperiod is a predominant environmental cue that governs the pattern of melatonin secretion from the pineal gland, which helps the animal determine season. For example, reproductive activity of the Syrian hamster is promoted by long summer days and inhibited by short winter days. Levels of *Kiss1* mRNA in the ARC are reduced in male Syrian hamsters after transfer from long-day to short-day conditions, which leads to reproductive quiescence (76). This seasonal change appears to be melatonin-dependent because pineal gland ablation prevents

this short-day induced down-regulation of *Kiss1* expression (76); however, it is unclear whether melatonin acts directly on *Kiss1* neurons. Remarkably, chronic infusion of kisspeptin restores testicular activity in Syrian hamsters despite persisting photoinhibitory conditions (76). Both male and female Siberian hamsters held in short-day conditions exhibit a reduced response to exogenous kisspeptin treatment and show negligible kisspeptin expression in the AVPV and high expression in the ARC (77). In long-day conditions, however, this expression is reversed, with marked kisspeptin staining in the AVPV and only minor expression in the ARC (77, 78). It should be noted that some studies performed in the hamster have been confounded by a lack of specificity (and proper validation) of the antibodies used to detect kisspeptin by immunocytochemistry. Furthermore, interpreting the results of semi-quantitative immunocytochemistry can be challenging. For example, when there is little apparent expression of kisspeptin, this could mean either that little kisspeptin is being made (thus none appears) or that whatever is being made (perhaps even in great abundance) is rapidly released. Thus, analysis of staining intensity by immunocytochemistry should be interpreted with caution. Nevertheless, it does appear that low levels of kisspeptin and a reduced sensitivity to the hormone may contribute to the reproductive quiescence induced by short-day photoperiods. Investigations in the hamster are complicated by the fact that kisspeptin activity in the two species (Syrian and Siberian) appears to respond differently to short days, which makes generalizations difficult.

The sheep, another seasonally breeding species, becomes reproductively active as the days become shorter in autumn and becomes quiescent as the days become longer. The expression of kisspeptin also varies with season in the sheep. For example, *Kiss1* expression is lower and there are fewer kisspeptin terminal contacts onto GnRH neurons during the nonbreeding period (long days) compared with the breeding period (short days) (94, 107). Moreover, during anestrus (non breeding) season, infusion of kisspeptin for several days can induce ovulation (142). Hence, there appears to be a fundamental contribution made by kisspeptin signaling to regulate seasonal breeding in a variety of species.

#### J. Puberty

Several recent reviews have focused on the role of kisspeptin in puberty (176–182). Humans and mice lacking a functional kisspeptin receptor do not progress normally to achieve puberty (7, 8). Many species exhibit a marked increase in *Kiss1* and/or *Kiss1r* expression in association with the onset of puberty, suggesting that kisspeptin acts as gatekeeper for puberty (48, 51, 70, 90, 101, 168, 183).

In the mouse, the distribution of *Kiss1* neurons and expression of *Kiss1* mRNA changes over development.

Clarkson *et al.* (183) have reported that the number of Kiss1 neurons in the AVPV/PeN increases exponentially from postnatal day 10 through puberty. In addition, using dual immunofluorescence, Clarkson and Herbison (73) have found that the proximity of appositions between kisspeptin fibers and GnRH neuronal somata increases at the time of puberty (Fig. 6), suggesting increased kisspeptin input to GnRH neurons at this developmental juncture. This increased input does not appear to be associated with an increase in the expression of kisspeptin receptors in GnRH neurons because Han *et al.* (70) have reported that the per cell content of *Kiss1r* mRNA does not differ between juvenile and adult animals. On the other hand, *Kiss1* expression in the AVPV is higher in the adult compared with juvenile mouse; moreover, the percentage of GnRH neurons responding to kisspeptin increases from approximately 25% in juveniles to approximately 45% in prepubertal mice to more than 90% in adults (70), suggesting that GnRH neurons become more sensitive to kisspeptin throughout postnatal development—without altering *Kiss1r* gene expression. Furthermore, central administration of submaximal doses of kisspeptin stimulates LH secretion in adult, but not prepubertal male mice (70). Central and peripheral administration of kisspeptin to juvenile female rats also stimulates LH release and ovulation (184) and advances the timing of vaginal opening (168).

Clarkson and Herbison (183) have proposed a model to explain the pubertal activation of gonadotropin secretion—based on the observation that estradiol increases the number of identifiable Kiss1 cells in the AVPV/PeN of prepubertal animals (as detected by immunocytochemistry). According to their model, estradiol in the prepubertal period stimulates Kiss1 neurons in the AVPV/PeN that activate GnRH neurons. Increased GnRH secretion then stimulates gonadotropin release, which subsequently drives further estradiol production from the ovary—thus producing a feed-forward activational loop. This putative mechanism would cause AVPV/PeN neurons to act as “estradiol-dependent ‘amplifiers’ of GnRH neuron activity.” In support of this hypothesis, these investigators demonstrate that Kiss1 neurons are virtually absent in estradiol-deficient, aromatase knockout (ARKO) mice—which is perhaps not surprising because the expression of *Kiss1* in the AVPV/PeN has been shown to be estrogen/ER $\alpha$ /ERE-dependent (104, 158).

However, several other studies argue against the proposition that Kiss1 neurons in the AVPV/PeN play an inductive role in pubertal maturation (in either sex). First, adult female ARKO mice have been shown to have fully developed ovaries, containing numerous follicles, which never undergo ovulation—presumably reflecting a lack of estradiol-induced positive feedback (185). However, the very presence of developed follicles in these ARKO mice

suggests that the gonadotropin drive associated with pubertal development is not dependent on the presence of Kiss1 neurons in the AVPV/PeN—because those neurons are absent in ARKO mice. Moreover, it is not apparent how the regenerative feedback system proposed by Clarkson and Herbison (183) would explain puberty in males, which have only a few scattered Kiss1 neurons in their AVPV/PeN, even in adulthood (73, 75). Thus, any possible role for *Kiss1* neurons of the AVPV/PeN in pubertal development is unresolved and remains a matter of lively debate.

To determine whether kisspeptin is involved in the regulation of puberty in primates, Shahab *et al.* (101) used real-time PCR to identify changes in the hypothalamic expression of *Kiss1* and *Kiss1r* around the time of puberty. In agonadal male monkeys, hypothalamic expression of *Kiss1* was greater in animals at the presumptive time of puberty than juvenile animals, whereas there was no difference in *Kiss1r* expression (101). In ovary-intact females, *Kiss1* transcript expression was 3-fold greater in midpubertal monkeys compared with juvenile or early pubertal animals, corresponding with a progressive increase in *Kiss1r* mRNA from juvenile to midpubertal stages (101). These observations suggest that increased kisspeptin signaling in the primate hypothalamus is responsible for initiating the transition from a hypogonadotropic state associated with a juvenile stage of development to a resurgence of pulsatile GnRH release at the time of puberty. Confirming this hypothesis is recent evidence from Keen *et al.* (89) in the Terasawa lab showing that an increase in kisspeptin-54 output, specifically an increase in kisspeptin-54 pulse frequency, occurs at the onset of puberty (as demonstrated via *in vivo* microdialysis in prepubertal and pubertal ovarian-intact female rhesus monkeys) (Fig. 19).

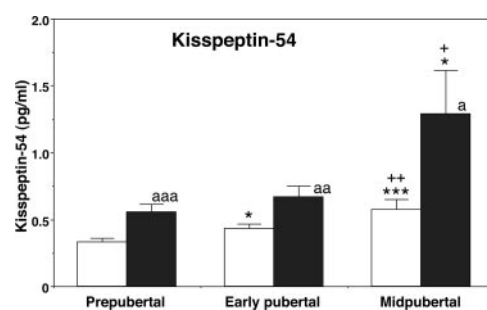

**FIG. 19.** Developmental changes in the release of kisspeptin-54 in push-pull perfusates in monkeys. Kisspeptin-54 levels gradually increase along with the pubertal increase in GnRH release. A nocturnal increase in kisspeptin-54 release is already observed in prepubertal monkeys and continues through the pubertal period. The number of animals at the prepubertal, early pubertal, and midpubertal stages was six, six, and five, respectively. White bars, Morning values; black bars, evening values. \*,  $P < 0.05$  vs. prepubertal; \*\*\*,  $P < 0.001$  vs. prepubertal; +,  $P < 0.05$  vs. early pubertal; ++,  $P < 0.01$  vs. early pubertal; a,  $P < 0.05$  vs. morning; aa,  $P < 0.01$  vs. morning; aaa,  $P < 0.001$  vs. morning. [Modified with permission from Keen *et al.*, 2008 (89) © The Endocrine Society].

Collectively, these findings provide strong support for an important role of kisspeptin—most likely produced from Kiss1 neurons in ARC—in initiating puberty, in many, if not all mammals. The next challenge is to figure out what triggers amplification of kisspeptin signaling at the time of puberty. Finally, despite our yearning to identify unified themes, we must remember that the molecular and cellular mechanisms that control the onset of puberty differ remarkably across Orders (*e.g.*, Rodentia, including mice and rats; Artiodactyla, including sheep; and Primates, including humans), and hence, the role of kisspeptin in gating pubertal maturation is likely to be different among these groups.

### K. Sexual differentiation

Sexual differentiation of the Kiss1 circuits is species specific. For example, in the adult sheep (unlike the rat), the ARC is sexually differentiated, with ewes expressing higher numbers of Kiss1 neurons than rams. This finding is not surprising, given the putative role of the ovine ARC in mediating the sexually dimorphic GnRH/LH surge (155, 186). In the rodent, the AVPV is sexually differentiated, being larger and comprising more cells in the female than the male, reflecting sexual differentiation of many neuronal phenotypes, including tyrosine hydroxylase-positive neurons, neurotensin neurons, as well as Kiss1 neurons (73, 75, 79, 148, 149). Because the AVPV is thought to play a critical role in relaying the positive feedback effects of estradiol to GnRH neurons (82, 144), it is not surprising that the male rodent is incapable of generating a GnRH/LH surge. The sex difference in Kiss1 expression of the adult rodent is organized perinatally, as evidenced by the fact that neonatally androgenized females display a male-like pattern of *Kiss1* expression in the AVPV in adulthood and lack the capacity to generate a GnRH/LH surge (75, 187). Likewise, neonatally castrated males show a feminized pattern of Kiss1 expression in the AVPV and estradiol administered during the neonatal critical period defeminizes Kiss1 expression, suggesting that in the normal male, testosterone exerts its effects on Kiss1 expression through an estrogen-receptor-dependent pathway (206).

Kiss1 expression in the ARC of the adult rodent is not sexually differentiated and thus not apparently dependent upon the perinatal sex steroid milieu (75). However, this generalization does not apply to the prepubertal animal, where it does appear that *Kiss1* and *NKB* (expressed in Kiss1 neurons) in the ARC are sexually differentiated. Prepubertal (postnatal day 15) rodents show a reduced rise in *Kiss1/NKB* expression in the ARC after gonadectomy (compared with females), and this phenomenon is associated with a more restrained postcastration rise in LH in the male compared with the female (for preliminary data, see

Ref. 188). This sexually differentiated response to castration in the prepubertal animal does not occur in the adult, wherein both sexes manifest a parallel rise in *Kiss1/NKB* expression and LH (188). Thus, sex differences in the tempo of sexual maturation (females being earlier than males) may reflect a differential sensitivity to the steroid milieu in the prepubertal animal. This remains to be tested.

## VII. Action outside the Hypothalamic-Pituitary Axis

The current literature on the kisspeptin signaling system has been focused primarily on the roles of kisspeptin in reproduction and tumor metastasis. However, some recent studies indicate that kisspeptin may serve additional physiological functions in the nervous system and beyond. Kiss1 and Kiss1r expression is not restricted to the neuroendocrine axis but can be found in a variety of organs, with widespread and divergent implications.

### A. Hippocampus and amygdala

In 1971, Velasco and Taleisnik (189) described a modulating influence of the amygdala and hippocampus on gonadotropin release. More recently, *in situ* hybridization has revealed expression of *Kiss1r* in these two brain regions (2, 3, 6), although a clear role of kisspeptin in the limbic system is unclear. It is interesting to note that the expression of *Kiss1* mRNA in the hippocampus is increased by about 50% 2 wk after gonadectomy in the male rat (190), suggesting a possible neuroendocrine function in this area. *Kiss1r* is highly expressed in the granule cells of the dentate gyrus (6), and kisspeptin treatment enhances excitability of those cells (191). Thus, kisspeptin may play a role in various neurological processes, including cognition, regulation of neurogenesis, or pathogenesis of epilepsy (192). *Kiss1* mRNA in the amygdala is also regulated by testosterone in the male mouse (193).

### B. Adrenal

The high levels of kisspeptin during pregnancy may affect maternal and/or fetal adrenal production of aldosterone. During the third trimester of pregnancy, Kiss1r protein is highly expressed in the neocortex of fetal adrenals, at a level significantly higher than in adult adrenals (194). Notably, kisspeptin increases aldosterone production in fetal adrenal cells and H295R adrenal cells, increases angiotensin II-stimulated aldosterone production, and increases the ability of the H295R cells to metabolize exogenous pregnenolone to aldosterone (194). These observations provide insight into the possible regulation of adrenocortical steroidogenesis and function of the human fetal adrenal gland during the latter stages of pregnancy.

### C. Pancreatic islets

Recent evidence points to a relationship between pancreatic endocrine cells and kisspeptin. Pancreatic  $\beta$ -cells sense and respond to both short-term fluctuations and long-term changes in energy balance, and the majority of islet endocrine cells express high levels of Kiss1 and Kiss1r, which both colocalize with insulin and glucagon (195). Expression of both kisspeptin peptide and receptor within an individual islet cell suggests a local autocrine or paracrine (*vs.* systemic) mode of action for pancreatic islet kisspeptin. A stimulatory effect of Kiss1 on glucose-induced insulin secretion in mouse and human islets (195, 196) implies a regulatory role of kisspeptin in normal regulation of islet function. However, the importance of this system has yet to be established because humans with mutated *KISS1R* and mice bearing deletions of the *Kiss1r* and *Kiss1* (knockout mice) have not been reported to exhibit any apparent metabolic abnormality.

### D. Ovary/oviduct

Evidence suggests that kisspeptin plays a role at the level of the ovary. Castellano *et al.* (197) report expression of *Kiss1* and *Kiss1r* in the adult rat ovary throughout the estrous cycle. It appears that levels of *Kiss1r* mRNA in the ovary remain relatively constant throughout the estrous cycle; however, levels of *Kiss1* mRNA fluctuate dramatically, with a sharp increase on the afternoon of proestrus, directly preceding ovulation (197). Furthermore, immunohistochemical analysis demonstrates the presence of Kiss1-ir in the rat ovary, particularly in the theca layers of growing follicles, corpora lutea, and interstitial gland (197). Collectively, these observations suggest that locally produced ovarian kisspeptin directly influences folliculogenesis, ovulation, and perhaps luteal function in rats, which may also apply to other animals, including humans and marmosets, where kisspeptin has been identified in the ovary (198).

The postovulatory events in female reproduction may also depend on locally produced kisspeptin; Gaytán *et al.* (199) have proposed a role for oviductal kisspeptin in the prevention of ectopic (tubal) implantation. The authors describe a regional-specific pattern of expression that appears to be cycle-dependent, with maximum expression at the time of proestrus/estrus and lower levels at metestrus/diestrus (199). Following the role of kisspeptin in regulating uterine implantation (200), kisspeptin expression in the oviduct may play a physiological role in preventing ectopic implantation in the rat (and perhaps other species as well).

### E. Vasculature

Mead *et al.* (201) have explored a possible role of kisspeptin in the cardiovascular system of humans. They report expression of *KISS1R* mRNA in the aorta, coronary artery, and umbilical vein, and subsequently immu-

nocytochemically localized KISS1 and KISS1R to the atherosclerotic plaque of the coronary artery. Utilizing RIA along with immunocytochemistry, the authors identified a potential source of kisspeptin in vascular endothelial cells, which could enable paracrine regulation of vascular tone (201). Furthermore, Kisspeptin-10, -13, and -54 can act as potent vasoconstrictors in isolated human coronary artery and umbilical vein, producing a response as robust as the response to angiotensin-II in the coronary artery (201). Collectively, these findings allude to a novel function of kisspeptin and its receptor in mediating vasoconstriction, especially in blood vessels prone to atherosclerosis, which yields important implications in the pathophysiology of cardiovascular disease and is perhaps even related to preeclampsia in pregnancy.

## VIII. Closing Remarks: Challenges, Open Questions, and Future Directions

Kisspeptin is a peptide with a diverse and multifunctional nature, involving varied whole body physiological systems and acting at all levels of the reproductive axis—brain, pituitary, gonad, and accessory organs. Kisspeptin exercises a crucial role in stimulating GnRH, relaying steroid hormone negative and positive feedback signals to GnRH neurons, serving as a gatekeeper to the onset of puberty, and relaying photoperiodic information. Other less well-defined actions of kisspeptin may include a role in the control of insulin and/or glucagon secretion, perhaps local control of ovulation, and blocking ectopic implantation, to name a few. The field of “reproductive kisspeptinology” has blossomed and matured in the past 6 yr; however, much is yet to be learned and important questions remain unanswered. For example, what specific neurotransmitters and signaling molecules control kisspeptin secretion? What is the role of kisspeptin’s cotransmitters in the ARC (dynorphin, NKB, and others?) in the regulation of GnRH secretion? How do circadian signals from the SCN interact with the kisspeptin neurons in the AVPV? What activates kisspeptin neurons at puberty? What is the molecular basis for sexual differentiation of kisspeptin neurons? What molecular form(s) of the various kisspeptin fragments represent the endogenously active molecule? What is the physiological significance of kisspeptin signaling outside of the hypothalamus? What are the molecular mechanisms by which estradiol inhibits the expression of Kiss1 in the ARC but induces its expression in the AVPV? How do progesterone and the PR influence Kiss1 gene expression? What are the electrophysiological properties of Kiss1 neurons in the AVPV and ARC? What is the functional significance of enhanced Kiss1 production during pregnancy?

Several investigational tools may aid in answering these questions. For example, generation of a mouse expressing green fluorescent protein under the *Kiss1* promoter (*Kiss1*-GFP), a *Kiss1*-cre mouse, a floxed *Kiss1* mouse, or a *Kiss1* ribo-tagged mouse could prove invaluable to answer these questions. Another frontier in kisspeptin biology is the development of novel ligands (antagonists and agonists) to the kisspeptin receptor. Such analogs could prove useful in the treatment of people with hypogonadotropic hypogonadism and other reproductive disorders (e.g., precocious puberty, endometriosis, metastatic prostate cancer, and ovulation induction) and could even provide a novel strategy for hormonal birth control (for both males and females). Beyond this, kisspeptin has been implicated for a role in a variety of other physiological control systems (e.g., metabolism, vascular biology, pregnancy, cancer)—thus, improved understanding of kisspeptin and its receptor may benefit scientific research across a wide swath of the physiological community, not just reproductive endocrinology. We eagerly await the next chapters in the kisspeptin story.

*“It doesn’t matter how beautiful your theory is, it doesn’t matter how smart you are. If it doesn’t agree with experiment, it’s wrong.”*

—Richard Feynman, physicist, Nobel laureate (1918–1988)

## Acknowledgments

We are grateful to have had engaging scientific discourse with many friends near and far, including Stephanie Seminara, William F. Crowley, Jr., Nelly Pitteloud, Yee-Ming Chan, Ursula Kaiser, John Gill, Gloria Hoffman, Tony Plant, Allan Herbison, Seong-Kyu Han, Manuel Tena-Sempere, Juan Roa, Alain Caraty, Sue Moenter, Emilie Rissman, Jon Levine, Larry Jameson, Christine Glidewell-Kenney, Jeffrey Weiss, Zhen Zhao, Mariana Jimenez Brigitte Mann, Sally Radovick, Andrew Wolfe, Antonia Roseweir, Robert Millar, Lothar Jennes, Susan Smith, Satoshi Ohkura, Hiroaki Okamura, Yoshihiro Wakabayashi, Kei-Ichiro Maeda, Hiroko Tsukamura, Penny Swanson, Graham Young, Martin Myers, Richard Palmiter, Horacio de la Iglesia, Travis Lilley, Benjamin Smarr, Jessica Robertson, Chris Hague, Jennifer Wacker-Mhyre, Mia DeFino, Robert Braun, Stan McKnight, and Charles Chavkin. We thank the current and former members of the Steiner/Clifton/Wise laboratory for their many intellectual contributions to the ideas described here, including Phyllis Wise, Jeremy Smith, Greg Fraley, Stephanie Krasnow, Karl Hansen, Matthew Cunningham, Michael Irwig, Michelle Gottsch, Alexander (Sasha) Kauffman, Victor Navarro, Heather Dungan-Lemko, Simina Popa, Alisa Byquist, Sonya Jakawich, Janessa Lawhorn, Kathy Lee, Roxana Naderi, Maile Parker, Megan McClean, Sarah McConkey, Sarah Ahmad, In Hae Lee, Nicole Filipek, Sho Suzuki, Candice Brown, and Jodi Downs.

Address all correspondence and requests for reprints to: Amy E. Oakley, Department of Physiology and Biophysics, University of Washington, Box 356460, 1705 NE Pacific Street, Health Sciences Building Room BB604, Seattle, Washington 98195-6460. E-mail: aoakley@u.washington.edu.

This work was supported by the National Institutes of Health [R01 HD27142, the Eunice Kennedy Shriver National Institutes of Child Health and Human Development (NICHD) through cooperative agree-

ment U54 HD12629 as part of the Specialized Cooperative Centers Program in Reproduction and Infertility Research, and T32-DK007247].

Disclosure Summary: The authors have nothing to disclose.

## References

1. Lee JH, Miele ME, Hicks DJ, Phillips KK, Trent JM, Weissman BE, Welch DR 1996 KiSS-1, a novel human malignant melanoma metastasis-suppressor gene. *J Natl Cancer Inst* 88:1731–1737
2. Kotani M, Dethoux M, Vandenbergaeerde A, Communi D, Vanderwinden JM, Le Poul E, Brézillon S, Tyldesley R, Suarez-Huerta N, Vandeput F, Blanpain C, Schiffmann SN, Vassart G, Parmentier M 2001 The metastasis suppressor gene KiSS-1 encodes kisspeptins, the natural ligands of the orphan G protein-coupled receptor GPR54. *J Biol Chem* 276:34631–34636
3. Muir AI, Chamberlain L, Elshourbagy NA, Michalovich D, Moore DJ, Calamari A, Szekeres PG, Sarau HM, Chambers JK, Murdock P, Steplewski K, Shabon U, Miller JE, Middleton SE, Darker JG, Larminie CG, Wilson S, Bergsma DJ, Emson P, Faull R, Philpott KL, Harrison DC 2001 AXOR12, a novel human G protein-coupled receptor, activated by the peptide KiSS-1. *J Biol Chem* 276:28969–28975
4. Ohtaki T, Shintani Y, Honda S, Matsumoto H, Hori A, Kanehashi K, Terao Y, Kumano S, Takatsu Y, Masuda Y, Ishibashi Y, Watanabe T, Asada M, Yamada T, Suenaga M, Kitada C, Usuki S, Kurokawa T, Onda H, Nishimura O, Fujino M 2001 Metastasis suppressor gene KiSS-1 encodes peptide ligand of a G-protein-coupled receptor. *Nature* 411:613–617
5. Clements MK, McDonald TP, Wang R, Xie G, O’Dowd BF, George SR, Austin CP, Liu Q 2001 FMR1-related neuropeptides are agonists of the orphan G-protein-coupled receptor GPR54. *Biochem Biophys Res Commun* 284:1189–1193
6. Lee DK, Nguyen T, O’Neill GP, Cheng R, Liu Y, Howard AD, Coulombe N, Tan CP, Tang-Nguyen AT, George SR, O’Dowd BF 1999 Discovery of a receptor related to the galanin receptors. *FEBS Lett* 446:103–107
7. de Roux N, Genin E, Carel JC, Matsuda F, Chaussain JL, Milgrom E 2003 Hypogonadotropic hypogonadism due to loss of function of the KiSS1-derived peptide receptor GPR54. *Proc Natl Acad Sci USA* 100:10972–10976
8. Seminara SB, Messager S, Chatzidakis EE, Thresher RR, Acierno Jr JS, Shagoury JK, Bo-Abbas Y, Kuohung W, Schwinof KM, Hendrick AG, Zahn D, Dixon J, Kaiser UB, Slaughaupt SA, Gusella JF, O’Rahilly S, Carlton MB, Crowley Jr WF, Aparicio SA, Colledge WH 2003 The GPR54 gene as a regulator of puberty. *N Engl J Med* 349:1614–1627
9. Funes S, Hedrick JA, Vassileva G, Markowitz L, Abbondanzo S, Golovko A, Yang S, Monsma FJ, Gustafson EL 2003 The KiSS-1 receptor GPR54 is essential for the development of the murine reproductive system. *Biochem Biophys Res Commun* 312:1357–1363
10. Harms JF, Welch DR, Miele ME 2003 KiSS1 metastasis suppression and emergent pathways. *Clin Exp Metastasis* 20:11–18
11. Gottsch ML, Clifton DK, Steiner RA 2009 From KiSS1 to kisspeptins: an historical perspective and suggested nomenclature. *Peptides* 30:4–9
12. Ringel MD, Hardy E, Bernet VJ, Burch HB, Schuppert F, Burman KD, Saji M 2002 Metastin receptor is overexpressed in papillary thyroid cancer and activates MAP ki-



- nase in thyroid cancer cells. *J Clin Endocrinol Metab* 87: 2399
13. Marchese A, George SR, Kolakowski Jr LF, Lynch KR, O'Dowd BF 1999 Novel GPCRs and their endogenous ligands: expanding the boundaries of physiology and pharmacology. *Trends Pharmacol Sci* 20:370–375
  14. Greenberg MJ, Price DA 1992 Relationships among the FMRFamide-like peptides. *Prog Brain Res* 92:25–37
  15. Li C, Kim K, Nelson LS 1999 FMRFamide-related neuropeptide gene family in *Caenorhabditis elegans*. *Brain Res* 848:26–34
  16. Stafford LJ, Xia C, Ma W, Cai Y, Liu M 2002 Identification and characterization of mouse metastasis-suppressor Kiss1 and its G-protein-coupled receptor. *Cancer Res* 62:5399–5404
  17. Liu X, Lee K, Herbison AE 2008 Kisspeptin excites gonadotropin-releasing hormone neurons through a phospholipase C/calcium-dependent pathway regulating multiple ion channels. *Endocrinology* 149:4605–4614
  18. Constantin S, Caligioni CS, Stojilkovic S, Wray S 2009 Kisspeptin-10 facilitates a plasma membrane-driven calcium oscillator in gonadotropin-releasing hormone-1 neurons. *Endocrinology* 150:1400–1412
  19. Zhang C, Roepke TA, Kelly MJ, Rønnekleiv OK 2008 Kisspeptin depolarizes gonadotropin-releasing hormone neurons through activation of TRPC-like cationic channels. *J Neurosci* 28:4423–4434
  20. Castellano JM, Navarro VM, Fernández-Fernández R, Castaño JP, Malagón MM, Aguilar E, Dieguez C, Magni P, Pinilla L, Tena-Sempere M 2006 Ontogeny and mechanisms of action for the stimulatory effect of kisspeptin on gonadotropin-releasing hormone system of the rat. *Mol Cell Endocrinol* 257–258:75–83
  21. Lee JY, Moon JS, Eu YJ, Lee CW, Yang ST, Lee SK, Jung HH, Kim HH, Rhim H, Seong JY, Kim JI 2009 Molecular interaction between kisspeptin decapeptide analogs and a lipid membrane. *Arch Biochem Biophys* 485:109–114
  22. Wacker JL, Feller DB, Tang XB, Defino MC, Namkung Y, Lyssand JS, Mhyre AJ, Tan X, Jensen JB, Hague C 2008 Disease-causing mutation in GPR54 reveals the importance of the second intracellular loop for class A G-protein-coupled receptor function. *J Biol Chem* 283:31068–31078
  23. Cerrato F, Seminara SB 2007 Human genetics of GPR54. *Rev Endocr Metab Disord* 8:47–55
  24. Colledge WH 2009 Transgenic mouse models to study Gpr54/kisspeptin physiology. *Peptides* 30:34–41
  25. Gianetti E, Seminara S 2008 Kisspeptin and KISS1R: a critical pathway in the reproductive system. *Reproduction* 136:295–301
  26. Teles MG, Bianco SD, Brito VN, Trarbach EB, Kuohung W, Xu S, Seminara SB, Mendonca BB, Kaiser UB, Latronico AC 2008 A GPR54-activating mutation in a patient with central precocious puberty. *N Engl J Med* 358:709–715
  27. West A, Vojta PJ, Welch DR, Weissman BE 1998 Chromosome localization and genomic structure of the Kiss-1 metastasis suppressor gene (KISS1). *Genomics* 54:145–148
  28. Mikkelsen JD, Ansel L, Bentsen A, Simonneaux V, Mapping of kisspeptin neurons in the adult male rat brain. Proc First World Conference on Kisspeptin Signaling in the Brain, Cordoba, Spain, 2008; p 42
  29. Fukusumi S, Habata Y, Yoshida H, Iijima N, Kawamata Y, Hosoya M, Fujii R, Hinuma S, Kitada C, Shintani Y, Suenaga M, Onda H, Nishimura O, Tanaka M, Ibata Y, Fujino M 2001 Characteristics and distribution of endogenous RFamide-related peptide-1. *Biochim Biophys Acta* 1540:221–232
  30. Hinuma S, Shintani Y, Fukusumi S, Iijima N, Matsumoto Y, Hosoya M, Fujii R, Watanabe T, Kikuchi K, Terao Y, Yano T, Yamamoto T, Kawamata Y, Habata Y, Asada M, Kitada C, Kurokawa T, Onda H, Nishimura O, Tanaka M, Ibata Y, Fujino M 2000 New neuropeptides containing carboxy-terminal RFamide and their receptor in mammals. *Nat Cell Biol* 2:703–708
  31. Ukena K, Iwakoshi E, Minakata H, Tsutsui K 2002 A novel rat hypothalamic RFamide-related peptide identified by immunoaffinity chromatography and mass spectrometry. *FEBS Lett* 512:255–258
  32. Ukena K, Tsutsui K 2001 Distribution of novel RFamide-related peptide-like immunoreactivity in the mouse central nervous system. *Neurosci Lett* 300:153–156
  33. Yano T, Iijima N, Kakihara K, Hinuma S, Tanaka M, Ibata Y 2003 Localization and neuronal response of RFamide related peptides in the rat central nervous system. *Brain Res* 982:156–167
  34. Yoshida H, Habata Y, Hosoya M, Kawamata Y, Kitada C, Hinuma S 2003 Molecular properties of endogenous RFamide-related peptide-3 and its interaction with receptors. *Biochim Biophys Acta* 1593:151–157
  35. Orsini MJ, Klein MA, Beavers MP, Connolly PJ, Middleton SA, Mayo KH 2007 Metastin (KISS-1) mimetics identified from peptide structure-activity relationship-derived pharmacophores and directed small molecule database screening. *J Med Chem* 50:462–471
  36. Gutiérrez-Pascual E, Leprince J, Martínez-Fuentes AJ, Ségalas-Milazzo I, Pineda R, Roa J, Duran-Prado M, Guilhaudis L, Desperrois E, Lebreton A, Pinilla L, Tonon MC, Malagón MM, Vaudry H, Tena-Sempere M, Castaño JP 2009 In vivo and in vitro structure-activity relationships and structural conformation of kisspeptin-10-related peptides. *Mol Pharmacol* 76:58–67
  37. Niida A, Wang Z, Tomita K, Oishi S, Tamamura H, Otaka A, Navenot JM, Broach JR, Peiper SC, Fujii N 2006 Design and synthesis of downsized metastin (45–54) analogs with maintenance of high GPR54 agonistic activity. *Bioorg Med Chem Lett* 16:134–137
  38. Tomita K, Niida A, Oishi S, Ohno H, Cluzeau J, Navenot JM, Wang ZX, Peiper SC, Fujii N 2006 Structure-activity relationship study on small peptidic GPR54 agonists. *Bioorg Med Chem* 14:7595–7603
  39. Tomita K, Narumi T, Niida A, Oishi S, Ohno H, Fujii N 2007 Fmoc-based solid-phase synthesis of GPR54-agonistic pentapeptide derivatives containing alkene- and fluoroalkene-dipeptide isosteres. *Biopolymers* 88:272–278
  40. Tomita K, Oishi S, Cluzeau J, Ohno H, Navenot JM, Wang ZX, Peiper SC, Akamatsu M, Fujii N 2007 SAR and QSAR studies on the N-terminally acylated pentapeptide agonists for GPR54. *J Med Chem* 50:3222–3228
  41. Tomita K, Oishi S, Ohno H, Fujii N 2008 Structure-activity relationship study and NMR analysis of fluorobenzoyl pentapeptide GPR54 agonists. *Biopolymers* 90:503–511
  42. Kinoshita M, Tsukamura H, Adachi S, Matsui H, Uenoyama Y, Iwata K, Yamada S, Inoue K, Ohtaki T, Matsumoto H, Maeda K 2005 Involvement of central metastin in the regulation of preovulatory luteinizing

- hormone surge and estrous cyclicity in female rats. *Endocrinology* 146:4431–4436
43. Roseweir AK, Kauffman AS, Smith JT, Guerriero KA, Morgan K, Pielecka-Fortuna J, Pineda R, Gottsch ML, Tena-Sempere M, Moenter SM, Terasawa E, Clarke IJ, Steiner RA, Millar RP 2009 Discovery of potent kisspeptin antagonists delineate physiological mechanisms of gonadotropin regulation. *J Neurosci* 29:3920–3929
  44. Elizur A 2009 The KiSS1/GPR54 system in fish. *Peptides* 30:164–170
  45. Zohar Y, Munoz-Cueto JA, Elizur A, Kah O 23 April 2009 Neuroendocrinology of reproduction in teleost fish. *Gen Comp Endocrinol* 10.1016/j.ygcen.2009.04.017
  46. Parhar IS, Ogawa S, Sakuma Y 2004 Laser-captured single digoxigenin-labeled neurons of gonadotropin-releasing hormone types reveal a novel G protein-coupled receptor (Gpr54) during maturation in cichlid fish. *Endocrinology* 145:3613–3618
  47. Mohamed JS, Benninghoff AD, Holt GJ, Khan IA 2007 Developmental expression of the G protein-coupled receptor 54 and three GnRH mRNAs in the teleost fish cobia. *J Mol Endocrinol* 38:235–244
  48. Martinez-Chavez CC, Minghetti M, Migaud H 2008 GPR54 and rGnRH I gene expression during the onset of puberty in Nile tilapia. *Gen Comp Endocrinol* 156:224–233
  49. Nocillado JN, Levavi-Sivan B, Carrick F, Elizur A 2007 Temporal expression of G-protein-coupled receptor 54 (GPR54), gonadotropin-releasing hormones (GnRH), and dopamine receptor D2 (drd2) in pubertal female grey mullet, *Mugil cephalus*. *Gen Comp Endocrinol* 150:278–287
  50. Mechaly AS, Viñas J, Piferrer F 2009 Identification of two isoforms of the Kisspeptin-1 receptor (kiss1r) generated by alternative splicing in a modern teleost, the Senegalese sole (*Solea senegalensis*). *Biol Reprod* 80:60–69
  51. Filby AL, van Aerle R, Duitman J, Tyler CR 2008 The kisspeptin/gonadotropin-releasing hormone pathway and molecular signaling of puberty in fish. *Biol Reprod* 78:278–289
  52. Kanda S, Akazome Y, Matsunaga T, Yamamoto N, Yamada S, Tsukamura H, Maeda K, Oka Y 2008 Identification of KiSS-1 product kisspeptin and steroid-sensitive sexually dimorphic kisspeptin neurons in medaka (*Oryzias latipes*). *Endocrinology* 149:2467–2476
  53. Okubo K, Kanda S, Oka Y, Quantitative expression profiling of Kiss1 and its receptor in the teleost medaka. *Proc First World Conference on Kisspeptin Signaling in the Brain, Cordoba, Spain, 2008*; p 108
  54. Kitahashi T, Ogawa S, Parhar IS 2009 Cloning and expression of kiss2 in the zebrafish and medaka. *Endocrinology* 150:821–831
  55. Li S, Zhang Y, Liu Y, Huang X, Huang W, Lu D, Zhu P, Shi Y, Cheng CH, Liu X, Lin H 2009 Structural and functional multiplicity of the kisspeptin/GPR54 system in goldfish (*Carassius auratus*). *J Endocrinol* 201:407–418
  56. Yang B, Jiang Q, Chan T, Ko WK, Wong AO 9 June 2009 Goldfish kisspeptin: molecular cloning, tissue distribution of transcript expression, and stimulatory effects on prolactin, growth hormone and luteinizing hormone secretion and gene expression via direct actions at the pituitary level. *Gen Comp Endocrinol* 10.1016/j.ygcen.2009.06.001
  57. Biran J, Ben-Dor S, Levavi-Sivan B 2008 Molecular identification and functional characterization of the kisspeptin/kisspeptin receptor system in lower vertebrates. *Biol Reprod* 79:776–786
  58. van Aerle R, Kille P, Lange A, Tyler CR 2008 Evidence for the existence of a functional Kiss1/Kiss1 receptor pathway in fish. *Peptides* 29:57–64
  59. Felip A, Zanuy S, Carrillo M, Gomez A, Molecular characterization of two sea bass G-protein-coupled receptor 54 (GPR54): cDNA cloning and expression analysis. *Proc First World Conference on Kisspeptin Signaling in the Brain, Cordoba, Spain, 2008*; p 109
  60. Felip A, Zanuy S, Carrillo M, Gomez A, Evidence for two kisspeptins in vertebrate non-mammalian species: a particular study of kiss-1 system in the European sea bass, *Dicentrarchus labrax*. *Proc First World Conference on Kisspeptin Signaling in the Brain, Cordoba, Spain, 2008*; p 47
  61. Felip A, Zanuy S, Pineda R, Pinilla L, Carrillo M, Tena-Sempere M, Gomez A 25 Nov 2008 Evidence for two distinct KiSS genes in non-placental vertebrates that encode kisspeptins with different gonadotropin-releasing activities in fish and mammals. *Mol Cell Endocrinol* 10.1016/j.mce.2008.11.017
  62. Carrillo M, Zanuy S, Felip A, Bayarri MJ, Molés G, Gómez A 2009 Hormonal and environmental control of puberty in perciform fish: the case of sea bass. *Ann NY Acad Sci* 1163:49–59
  63. Kah O, Zanuy S, Felip A, Caraty A, Carrillo M, Characterization of a kisspeptin-10 system and relationship with the 3 GnRH systems in the brain of a perciform fish, the European sea bass (*Dicentrarchus labrax*). *Proc First World Conference on Kisspeptin Signaling in the Brain, Cordoba, Spain, 2008*; p 113
  64. Lee YR, Tsunekawa K, Moon MJ, Um HN, Hwang JI, Osugi T, Otaki N, Sunakawa Y, Kim K, Vaudry H, Kwon HB, Seong JY, Tsutsui K 2009 Molecular evolution of multiple forms of kisspeptins and GPR54 receptors in vertebrates. *Endocrinology* 150:2837–2846
  65. Moon JS, Lee YR, Oh da Y, Hwang JI, Lee JY, Kim JI, Vaudry H, Kwon HB, Seong JY 2009 Molecular cloning of the bullfrog kisspeptin receptor GPR54 with high sensitivity to *Xenopus* kisspeptin. *Peptides* 30:171–179
  66. Tobarí Y, Iijima N, Matsumoto K, Okanoya K, Ozawa H, Distribution of kisspeptin-like immunoreactivity in the brain of the bird, *Taeniopygia guttata*. *Proc First World Conference on Kisspeptin Signaling in the Brain, Cordoba, Spain, 2008*; p 115
  67. Akazome Y, Shinji K, Mitani Y, Okubo K, Oka Y, Possible novel form of kisspeptin and kisspeptin receptors in the medaka, *Oryzias latipes*. *Proc First World Conference on Kisspeptin Signaling in the Brain, Cordoba, Spain, 2008*; p 110
  68. Lapatto R, Pallais JC, Zhang D, Chan YM, Mahan A, Cerrato F, Le WW, Hoffman GE, Seminara SB 2007 Kiss1<sup>-/-</sup> mice exhibit more variable hypogonadism than Gpr54<sup>-/-</sup> mice. *Endocrinology* 148:4927–4936
  69. d'Anglemont de Tassigny X, Fagg LA, Dixon JP, Day K, Leitch HG, Hendrick AG, Zahn D, Franceschini I, Caraty A, Carlton MB, Aparicio SA, Colledge WH 2007 Hypogonadotropic hypogonadism in mice lacking a functional Kiss1 gene. *Proc Natl Acad Sci USA* 104:10714–10719
  70. Han SK, Gottsch ML, Lee KJ, Popa SM, Smith JT, Jakawich SK, Clifton DK, Steiner RA, Herbison AE 2005 Activation of gonadotropin-releasing hormone neurons by

- kisspeptin as a neuroendocrine switch for the onset of puberty. *J Neurosci* 25:11349–11356
71. Messager S, Chatzidaki EE, Ma D, Hendrick AG, Zahn D, Dixon J, Thresher RR, Malinge I, Lomet D, Carlton MB, Colledge WH, Caraty A, Aparicio SA 2005 Kisspeptin directly stimulates gonadotropin-releasing hormone release via G protein-coupled receptor 54. *Proc Natl Acad Sci USA* 102:1761–1766
  72. Gottsch ML, Cunningham MJ, Smith JT, Popa SM, Acohido BV, Crowley WF, Seminara S, Clifton DK, Steiner RA 2004 A role for kisspeptins in the regulation of gonadotropin secretion in the mouse. *Endocrinology* 145:4073–4077
  73. Clarkson J, Herbison AE 2006 Postnatal development of kisspeptin neurons in mouse hypothalamus; sexual dimorphism and projections to gonadotropin-releasing hormone neurons. *Endocrinology* 147:5817–5825
  74. Clarkson J, d'Anglemont de Tassigny X, Colledge WH, Caraty A, Herbison AE 2009 Distribution of kisspeptin neurons in the adult female mouse brain. *J Neuroendocrinol* 21:673–682
  75. Kauffman AS, Gottsch ML, Roa J, Byquist AC, Crown A, Clifton DK, Hoffman GE, Steiner RA, Tena-Sempere M 2007 Sexual differentiation of Kiss1 gene expression in the brain of the rat. *Endocrinology* 148:1774–1783
  76. Revel FG, Saboureaux M, Masson-Pévet M, Pévet P, Mikkelsen JD, Simonneaux V 2006 Kisspeptin mediates the photoperiodic control of reproduction in hamsters. *Curr Biol* 16:1730–1735
  77. Mason AO, Greives TJ, Scotti MA, Levine J, Frommeyer S, Ketterson ED, Demas GE, Kriegsfeld LJ 2007 Suppression of kisspeptin expression and gonadotropin axis sensitivity following exposure to inhibitory day lengths in female Siberian hamsters. *Horm Behav* 52:492–498
  78. Greives TJ, Mason AO, Scotti MA, Levine J, Ketterson ED, Kriegsfeld LJ, Demas GE 2007 Environmental control of kisspeptin: implications for seasonal reproduction. *Endocrinology* 148:1158–1166
  79. Adachi S, Yamada S, Takatsu Y, Matsui H, Kinoshita M, Takase K, Sugiura H, Ohtaki T, Matsumoto H, Uenoyama Y, Tsukamura H, Inoue K, Maeda K 2007 Involvement of anteroventral periventricular metastin/kisspeptin neurons in estrogen positive feedback action on luteinizing hormone release in female rats. *J Reprod Dev* 53:367–378
  80. Irwig MS, Fraley GS, Smith JT, Acohido BV, Popa SM, Cunningham MJ, Gottsch ML, Clifton DK, Steiner RA 2004 Kisspeptin activation of gonadotropin releasing hormone neurons and regulation of KiSS-1 mRNA in the male rat. *Neuroendocrinology* 80:264–272
  81. Kalamatianos T, Grimshaw SE, Poorun R, Hahn JD, Coen CW 2008 Fasting reduces KiSS-1 expression in the anteroventral periventricular nucleus (AVPV): effects of fasting on the expression of KiSS-1 and neuropeptide Y in the AVPV or arcuate nucleus of female rats. *J Neuroendocrinol* 20:1089–1097
  82. Smith JT, Popa SM, Clifton DK, Hoffman GE, Steiner RA 2006 Kiss1 neurons in the forebrain as central processors for generating the preovulatory luteinizing hormone surge. *J Neurosci* 26:6687–6694
  83. Brailoiu GC, Dun SL, Ohsawa M, Yin D, Yang J, Chang JK, Brailoiu E, Dun NJ 2005 KiSS-1 expression and metastin-like immunoreactivity in the rat brain. *J Comp Neurol* 481:314–329
  84. Dun SL, Brailoiu GC, Parsons A, Yang J, Zeng Q, Chen X, Chang JK, Dun NJ 2003 Metastin-like immunoreactivity in the rat medulla oblongata and spinal cord. *Neurosci Lett* 335:197–201
  85. Inoue N, Pheng V, Inamoto Y, Uenoyama Y, Tsukamura H, Ichikawa M, Maeda KI, Kisspeptin fibers directly contact with gonadotropin-releasing hormone fibers in the median eminence of female rats. *Proc First World Conference on Kisspeptin Signaling in the Brain, Cordoba, Spain, 2008*; p 74
  86. Richard N, Galmiche G, Corvaisier S, Caraty A, Kottler ML 2008 KiSS-1 and GPR54 genes are co-expressed in rat gonadotrophs and differentially regulated *in vivo* by oestradiol and gonadotrophin-releasing hormone. *J Neuroendocrinol* 20:381–393
  87. Caraty A, Locatelli A, Moenter SM, Karsch FJ, Sampling of hypophyseal portal blood of conscious sheep for direct monitoring of hypothalamic neurosecretory substances. *Methods Neurosci* 20:162–183
  88. Ohkura S, Takase K, Matsuyama S, Mogi K, Ichimaru T, Wakabayashi Y, Uenoyama Y, Mori Y, Steiner RA, Tsukamura H, Maeda KI, Okamura H 12 August 2009 Gonadotrophin-releasing hormone pulse generator activity in the hypothalamus of the goat. *J Neuroendocrinol* 10.1111/j.1365-2826.2009.01909.x
  89. Keen KL, Wegner FH, Bloom SR, Ghatge MA, Terasawa E 2008 An increase in kisspeptin-54 release occurs with the pubertal increase in luteinizing hormone-releasing hormone-1 release in the stalk-median eminence of female rhesus monkeys *in vivo*. *Endocrinology* 149:4151–4157
  90. Li S, Ren J, Yang G, Guo Y, Huang L 2008 Characterization of the porcine kisspeptins receptor gene and evaluation as candidate for timing of puberty in sows. *J Anim Breed Genet* 125:219–227
  91. Pompolo S, Pereira A, Estrada KM, Clarke IJ 2006 Colocalization of kisspeptin and gonadotropin-releasing hormone in the ovine brain. *Endocrinology* 147:804–810
  92. Franceschini I, Lomet D, Cateau M, Delsol G, Tillet Y, Caraty A 2006 Kisspeptin immunoreactive cells of the ovine preoptic area and arcuate nucleus co-express estrogen receptor alpha. *Neurosci Lett* 401:225–230
  93. Caldani M, Batailler M, Thiéry JC, Dubois MP 1988 LHRH-immunoreactive structures in the sheep brain. *Histochemistry* 89:129–139
  94. Smith JT, Coolen LM, Kriegsfeld LJ, Sari IP, Jaafarzadehshirazi MR, Maltby M, Bateman K, Goodman RL, Tilbrook AJ, Ubuka T, Bentley GE, Clarke IJ, Lehman MN 2008 Variation in kisspeptin and RFamide-related peptide (RFRP) expression and terminal connections to gonadotropin-releasing hormone neurons in the brain: a novel medium for seasonal breeding in the sheep. *Endocrinology* 149:5770–5782
  95. Smith JT, Rao A, Pereira A, Caraty A, Millar RP, Clarke IJ 2008 Kisspeptin is present in ovine hypophysial portal blood but does not increase during the preovulatory luteinizing hormone surge: evidence that gonadotropes are not direct targets of kisspeptin *in vivo*. *Endocrinology* 149:1951–1959
  96. Decourt C, Tillet Y, Caraty A, Franceschini I, Briant C 2008 Kisspeptin immunoreactive neurons in the equine hypothalamus interactions with GnRH neuronal system. *J Chem Neuroanat* 36:131–137
  97. Magee C, Foradori CD, Bruemmer JE, Arreguin-Arevalo JA, McCue PM, Handa RJ, Squires EL, Clay CM 2009 Biological and anatomical evidence for kisspeptin regula-

- tion of the hypothalamic-pituitary-gonadal axis of estrous horse mares. *Endocrinology* 150:2813–2821
98. deRoux N 2005 Isolated gonadotropic deficiency with and without anosmia: a developmental defect or a neuroendocrine regulation abnormality of the gonadotropic axis. *Horm Res* 64(Suppl 2):48–55
  99. Ramaswamy S, Guerriero KA, Gibbs RB, Plant TM 2008 Structural interactions between kisspeptin and GnRH neurons in the mediobasal hypothalamus of the male rhesus monkey (*Macaca mulatta*) as revealed by double immunofluorescence and confocal microscopy. *Endocrinology* 149:4387–4395
  100. Shibata M, Friedman RL, Ramaswamy S, Plant TM 2007 Evidence that down regulation of hypothalamic KiSS-1 expression is involved in the negative feedback action of testosterone to regulate luteinizing hormone secretion in the adult male rhesus monkey (*Macaca mulatta*). *J Neuroendocrinol* 19:432–438
  101. Shahab M, Mastronardi C, Seminara SB, Crowley WF, Ojeda SR, Plant TM 2005 Increased hypothalamic GPR54 signaling: a potential mechanism for initiation of puberty in primates. *Proc Natl Acad Sci USA* 102:2129–2134
  102. Rometo AM, Krajewski SJ, Voytko ML, Rance NE 2007 Hypertrophy and increased kisspeptin gene expression in the hypothalamic infundibular nucleus of postmenopausal women and ovariectomized monkeys. *J Clin Endocrinol Metab* 92:2744–2750
  103. Hrabovszky E, Vida B, Horvath B, Keller E, Caraty A, Coen CW, Liposits Z, Kallo I, Distribution of kisspeptin-like immunoreactivity in the human hypothalamus: demonstration of neuronal contacts with type-1 gonadotropin-releasing hormone neurons. *Proc First World Conference on Kisspeptin Signaling in the Brain, Cordoba, Spain, 2008*; p 73
  104. Smith JT, Cunningham MJ, Rissman EF, Clifton DK, Steiner RA 2005 Regulation of Kiss1 gene expression in the brain of the female mouse. *Endocrinology* 146:3686–3692
  105. Smith JT, Dungan HM, Stoll EA, Gottsch ML, Braun RE, Eacker SM, Clifton DK, Steiner RA 2005 Differential regulation of KiSS-1 mRNA expression by sex steroids in the brain of the male mouse. *Endocrinology* 146:2976–2984
  106. Clarkson J, d'Anglemont de Tassigny X, Moreno AS, Colledge WH, Herbison AE 2008 Kisspeptin-GPR54 signaling is essential for preovulatory gonadotropin-releasing hormone neuron activation and the luteinizing hormone surge. *J Neurosci* 28:8691–8697
  107. Smith JT, Clay CM, Caraty A, Clarke IJ 2007 KiSS-1 messenger ribonucleic acid expression in the hypothalamus of the ewe is regulated by sex steroids and season. *Endocrinology* 148:1150–1157
  108. Smith JT, Acohido BV, Clifton DK, Steiner RA 2006 KiSS-1 neurones are direct targets for leptin in the ob/ob mouse. *J Neuroendocrinol* 18:298–303
  109. Gingerich S, Wang X, Lee PK, Dhillon SS, Chalmers JA, Koltar MM, Belsham DD 2009 The generation of an array of clonal, immortalized cell models from the rat hypothalamus: analysis of melatonin effects on kisspeptin and gonadotropin-inhibitory hormone neurons. *Neuroscience* 162:1134–1140
  110. Goodman RL, Lehman MN, Smith JT, Coolen LM, de Oliveira CV, Jafarzadehshirazi MR, Pereira A, Iqbal J, Caraty A, Ciofi P, Clarke IJ 2007 Kisspeptin neurons in the arcuate nucleus of the ewe express both dynorphin A and neurokinin B. *Endocrinology* 148:5752–5760
  111. Foradori CD, Coolen LM, Fitzgerald ME, Skinner DC, Goodman RL, Lehman MN 2002 Colocalization of progesterone receptors in parvocellular dynorphin neurons of the ovine preoptic area and hypothalamus. *Endocrinology* 143:4366–4374
  112. Goubillon ML, Forsdike RA, Robinson JE, Ciofi P, Caraty A, Herbison AE 2000 Identification of neurokinin B-expressing neurons as a highly estrogen-receptive, sexually dimorphic cell group in the ovine arcuate nucleus. *Endocrinology* 141:4218–4225
  113. Burke MC, Letts PA, Krajewski SJ, Rance NE 2006 Co-expression of dynorphin and neurokinin B immunoreactivity in the rat hypothalamus: morphologic evidence of interrelated function within the arcuate nucleus. *J Comp Neurol* 498:712–726
  114. Pompolo S, Pereira A, Scott CJ, Fujiyama F, Clarke IJ 2003 Evidence for estrogenic regulation of gonadotropin-releasing hormone neurons by glutamatergic neurons in the ewe brain: an immunohistochemical study using an antibody against vesicular glutamate transporter-2. *J Comp Neurol* 465:136–144
  115. Navarro VM, Gottsch ML, Chavkin C, Okamura H, Clifton DK, Steiner RA, Regulation of GnRH secretion by Kiss1/dynorphin/neurokinin B neurons in the arcuate nucleus of the mouse. *J Neurosci* 10.1523/JNEUROSCI.1569-09.2009
  116. Inyushkin AN, Kallo I, Deli L, Kalamatianos T, Mikkelsen JD, Liposits Z, Coen CW, Dyball REJ, Kisspeptin is present presynaptically in the rat arcuate nucleus and modulates neuronal activity at that site. *Proc First World Conference on Kisspeptin Signaling in the Brain, Cordoba, Spain, 2008*; p 72
  117. Clarkson J, Herbison AE 2006 Development of GABA and glutamate signaling at the GnRH neuron in relation to puberty. *Mol Cell Endocrinol* 254–255:32–38
  118. Lee KJ, Maizlin II, Clifton DK, Steiner RA 2005 Coexpression of tyrosine hydroxylase and KiSS-1 mRNA in the anteroventral periventricular nucleus of the female mouse. *Proc 35th Annual Meeting of the Society for Neuroscience, Washington, DC, 2005* (Abstract 758.19)
  119. Watson Jr RE, Langub Jr MC, Engle MG, Maley BE 1995 Estrogen-receptive neurons in the anteroventral periventricular nucleus are synaptic targets of the suprachiasmatic nucleus and peri-suprachiasmatic region. *Brain Res* 689:254–264
  120. Kalsbeek A, Palm IF, La Fleur SE, Scheer FA, Perreau-Lenz S, Ruitter M, Kreier F, Cailotto C, Buijs RM 2006 SCN outputs and the hypothalamic balance of life. *J Biol Rhythms* 21:458–469
  121. Colledge WH 2009 Kisspeptins and GnRH neuronal signalling. *Trends Endocrinol Metab* 20:115–121
  122. Liu X, Herbison AE 2008 Small-conductance calcium-activated potassium channels control excitability and firing dynamics in gonadotropin-releasing hormone (GnRH) neurons. *Endocrinology* 149:3598–3604
  123. Pielecka-Fortuna J, Chu Z, Moenter SM 2008 Kisspeptin acts directly and indirectly to increase gonadotropin-releasing hormone neuron activity and its effects are modulated by estradiol. *Endocrinology* 149:1979–1986
  124. Quaynor S, Hu L, Leung PK, Feng H, Mores N, Krsmanovic LZ, Catt KJ 2007 Expression of a functional G protein-coupled receptor 54-kisspeptin autoregulatory sys-

- tem in hypothalamic gonadotropin-releasing hormone neurons. *Mol Endocrinol* 21:3062–3070
125. Dumalska I, Wu M, Morozova E, Liu R, van den Pol A, Alreja M 2008 Excitatory effects of the puberty-initiating peptide kisspeptin and group I metabotropic glutamate receptor agonists differentiate two distinct subpopulations of gonadotropin-releasing hormone neurons. *J Neurosci* 28:8003–8013
  126. d'Anglemont de Tassigny X, Fagg LA, Carlton MB, Colledge WH 2008 Kisspeptin can stimulate gonadotropin-releasing hormone (GnRH) release by a direct action at GnRH nerve terminals. *Endocrinology* 149:3926–3932
  127. Zhang C, Bosch MA, Rønnekleiv OK, Kelly MJ 2009  $\gamma$ -Aminobutyric acid B receptor mediated inhibition of gonadotropin-releasing hormone neurons is suppressed by kisspeptin-G protein-coupled receptor 54 signaling. *Endocrinology* 150:2388–2394
  128. Richard N, Corvaisier S, Camacho E, Kottler ML 2009 KiSS-1 and GPR54 at the pituitary level: overview and recent insights. *Peptides* 30:123–129
  129. Gutiérrez-Pascual E, Martínez-Fuentes AJ, Pinilla L, Tena-Sempere M, Malagón MM, Castaño JP 2007 Direct pituitary effects of kisspeptin: activation of gonadotrophs and somatotrophs and stimulation of luteinising hormone and growth hormone secretion. *J Neuroendocrinol* 19:521–530
  130. Navarro VM, Castellano JM, Fernández-Fernández R, Tovar S, Roa J, Mayen A, Barreiro ML, Casanueva FF, Aguilar E, Dieguez C, Pinilla L, Tena-Sempere M 2005 Effects of KiSS-1 peptide, the natural ligand of GPR54, on follicle-stimulating hormone secretion in the rat. *Endocrinology* 146:1689–1697
  131. Suzuki S, Kadokawa H, Hashizume T 2008 Direct kisspeptin-10 stimulation on luteinizing hormone secretion from bovine and porcine anterior pituitary cells. *Anim Reprod Sci* 103:360–365
  132. Belchetz PE, Plant TM, Nakai Y, Keogh EJ, Knobil E 1978 Hypophysial responses to continuous and intermittent delivery of hypothalamic gonadotropin-releasing hormone. *Science* 202:631–633
  133. McArdle CA, Gorospe WC, Huckle WR, Conn PM 1987 Homologous down-regulation of gonadotropin-releasing hormone receptors and desensitization of gonadotropes: lack of dependence on protein kinase C. *Mol Endocrinol* 1:420–429
  134. Wu JC, Sealfon SC, Miller WL 1994 Gonadal hormones and gonadotropin-releasing hormone (GnRH) alter messenger ribonucleic acid levels for GnRH receptors in sheep. *Endocrinology* 134:1846–1850
  135. Vizcarra JA, Wettemann RP, Braden TD, Turzillo AM, Nett TM 1997 Effect of gonadotropin-releasing hormone (GnRH) pulse frequency on serum and pituitary concentrations of luteinizing hormone and follicle-stimulating hormone, GnRH receptors, and messenger ribonucleic acid for gonadotropin subunits in cows. *Endocrinology* 138:594–601
  136. Mason DR, Arora KK, Mertz LM, Catt KJ 1994 Homologous down-regulation of gonadotropin-releasing hormone receptor sites and messenger ribonucleic acid transcripts in  $\alpha$  T3–1 cells. *Endocrinology* 135:1165–1170
  137. Seminara SB, DiPietro MJ, Ramaswamy S, Crowley Jr WF, Plant TM 2006 Continuous human metastatin 45–54 infusion desensitizes G protein-coupled receptor 54-induced gonadotropin-releasing hormone release monitored indirectly in the juvenile male Rhesus monkey (*Macaca mulatta*): a finding with therapeutic implications. *Endocrinology* 147:2122–2126
  138. Ramaswamy S, Seminara SB, Pohl CR, DiPietro MJ, Crowley Jr WF, Plant TM 2007 Effect of continuous intravenous administration of human metastatin 45–54 on the neuroendocrine activity of the hypothalamic-pituitary-testicular axis in the adult male rhesus monkey (*Macaca mulatta*). *Endocrinology* 148:3364–3370
  139. Thompson EL, Murphy KG, Patterson M, Bewick GA, Stamp GW, Curtis AE, Cooke JH, Jethwa PH, Todd JF, Ghatei MA, Bloom SR 2006 Chronic subcutaneous administration of kisspeptin-54 causes testicular degeneration in adult male rats. *Am J Physiol Endocrinol Metab* 291:E1074–E1082
  140. Tovar S, Vázquez MJ, Navarro VM, Fernández-Fernández R, Castellano JM, Vigo E, Roa J, Casanueva FF, Aguilar E, Pinilla L, Dieguez C, Tena-Sempere M 2006 Effects of single or repeated intravenous administration of kisspeptin upon dynamic LH secretion in conscious male rats. *Endocrinology* 147:2696–2704
  141. Plant TM, Ramaswamy S, DiPietro MJ 2006 Repetitive activation of hypothalamic G protein-coupled receptor 54 with intravenous pulses of kisspeptin in the juvenile monkey (*Macaca mulatta*) elicits a sustained train of gonadotropin-releasing hormone discharges. *Endocrinology* 147:1007–1013
  142. Caraty A, Smith JT, Lomet D, Ben Saïd S, Morrissey A, Cognie J, Doughton B, Baril G, Briant C, Clarke IJ 2007 Kisspeptin synchronizes preovulatory surges in cyclical ewes and causes ovulation in seasonally acyclic ewes. *Endocrinology* 148:5258–5267
  143. Navarro VM, Castellano JM, Fernández-Fernández R, Barreiro ML, Roa J, Sanchez-Criado JE, Aguilar E, Dieguez C, Pinilla L, Tena-Sempere M 2004 Developmental and hormonally regulated messenger ribonucleic acid expression of KiSS-1 and its putative receptor, GPR54, in rat hypothalamus and potent luteinizing hormone-releasing activity of KiSS-1 peptide. *Endocrinology* 145:4565–4574
  144. Dungan HM, Gottsch ML, Zeng H, Gragerov A, Bergmann JE, Vassilatis DK, Clifton DK, Steiner RA 2007 The role of kisspeptin-GPR54 signaling in the tonic regulation and surge release of gonadotropin-releasing hormone/luteinizing hormone. *J Neurosci* 27:12088–12095
  145. Kim W, Jessen HM, Auger AP, Terasawa E 2009 Postmenopausal increase in KiSS-1, GPR54, and luteinizing hormone releasing hormone (LHRH-1) mRNA in the basal hypothalamus of female rhesus monkeys. *Peptides* 30:103–110
  146. Terasawa E, Wiegand SJ, Bridson WE 1980 A role for medial preoptic nucleus on afternoon of proestrus in female rats. *Am J Physiol* 238:E533–E539
  147. Wintermantel TM, Campbell RE, Porteous R, Bock D, Gröne HJ, Todman MG, Korach KS, Greiner E, Pérez CA, Schütz G, Herbison AE 2006 Definition of estrogen receptor pathway critical for estrogen positive feedback to gonadotropin-releasing hormone neurons and fertility. *Neuron* 52:271–280
  148. Simerly RB 1989 Hormonal control of the development and regulation of tyrosine hydroxylase expression within a sexually dimorphic population of dopaminergic cells in the hypothalamus. *Brain Res Mol Brain Res* 6:297–310
  149. Dungan HM, Naderi R, Clifton DK, Steiner RA Role of neurotensin in the positive feedback control of GnRH/LH secretion in the mouse. Society for Neuroscience Meeting, Washington DC, November 2008. 381.5/RR30

150. Robertson JL, Clifton DK, de la Iglesia HO, Steiner RA, Kauffman AS 2009 Circadian regulation of Kiss1 neurons: implications for timing the preovulatory gonadotropin-releasing hormone/luteinizing hormone surge. *Endocrinology* 150:3664–3671
151. Chan YM, Broder-Fingert S, Seminara SB 2009 Reproductive functions of kisspeptin and Gpr54 across the life cycle of mice and men. *Peptides* 30:42–48
152. Tenenbaum-Rakover Y, Commenges-Ducos M, Iovane A, Aumas C, Admoni O, de Roux N 2007 Neuroendocrine phenotype analysis in five patients with isolated hypogonadotropic hypogonadism due to a L102P inactivating mutation of GPR54. *J Clin Endocrinol Metab* 92:1137–1144
153. Semple RK, Achermann JC, Ellery J, Farooqi IS, Karet FE, Stanhope RG, O'rahilly S, Aparicio SA 2005 Two novel missense mutations in G protein-coupled receptor 54 in a patient with hypogonadotropic hypogonadism. *J Clin Endocrinol Metab* 90:1849–1855
154. Alexander MJ, Dobner PR, Miller MA, Bullock BP, Dorsa DM, Leeman SE 1989 Estrogen induces neurotensin/neuromedin N messenger ribonucleic acid in a preoptic nucleus essential for the preovulatory surge of luteinizing hormone in the rat. *Endocrinology* 125:2111–2117
155. Estrada KM, Clay CM, Pompolo S, Smith JT, Clarke IJ 2006 Elevated KiSS-1 expression in the arcuate nucleus prior to the cyclic preovulatory gonadotrophin-releasing hormone/luteinizing hormone surge in the ewe suggests a stimulatory role for kisspeptin in oestrogen-positive feedback. *J Neuroendocrinol* 18:806–809
156. Knobil E, Neill JD, Freeman MF 2006 Neuroendocrine Control of the Ovarian Cycle of the Rat. In: Neill JD, ed. *Physiology of reproduction*. Chap 43. Vol 2, 3rd ed. San Diego: Academic Press/Elsevier, Inc.; 2327–2510
157. Glidewell-Kenney C, Hurley LA, Pfaff L, Weiss J, Levine JE, Jameson JL 2007 Nonclassical estrogen receptor  $\alpha$  signaling mediates negative feedback in the female mouse reproductive axis. *Proc Natl Acad Sci USA* 104:8173–8177
158. Gottsch ML, Navarro VM, Zhao Z, Glidewell-Kenney C, Weiss J, Jameson JL, Clifton DK, Levine JE, Steiner RA 2009 Regulation of Kiss1 and dynorphin gene expression in the murine brain by classical and nonclassical estrogen receptor pathways. *J Neurosci* 29:9390–9395
159. Roa J, Vigo E, Castellano JM, Navarro VM, Fernández-Fernández R, Casanueva FF, Dieguez C, Aguilar E, Pinilla L, Tena-Sempere M 2006 Hypothalamic expression of KiSS-1 system and gonadotropin-releasing effects of kisspeptin in different reproductive states of the female Rat. *Endocrinology* 147:2864–2878
160. Horikoshi Y, Matsumoto H, Takatsu Y, Ohtaki T, Kitada C, Usuki S, Fujino M 2003 Dramatic elevation of plasma metastin concentrations in human pregnancy: metastin as a novel placenta-derived hormone in humans. *J Clin Endocrinol Metab* 88:914–919
161. Hori A, Honda S, Asada M, Ohtaki T, Oda K, Watanabe T, Shintani Y, Yamada T, Suenaga M, Kitada C, Onda H, Kurokawa T, Nishimura O, Fujino M 2001 Metastin suppresses the motility and growth of CHO cells transfected with its receptor. *Biochem Biophys Res Commun* 286:958–963
162. Yamada S, Uenoyama Y, Kinoshita M, Iwata K, Takase K, Matsui H, Adachi S, Inoue K, Maeda KI, Tsukamura H 2007 Inhibition of metastin (kisspeptin-54)-GPR54 signaling in the arcuate nucleus-median eminence region during lactation in rats. *Endocrinology* 148:2226–2232
163. Tsukamura H, Maeda KI, Yokoyama A 1988 Effect of the suckling stimulus on daily LH surges induced by chronic oestrogen treatment in ovariectomized lactating rats. *J Endocrinol* 118:311–316
164. Downs JL, Wise PM 2009 The role of the brain in female reproductive aging. *Mol Cell Endocrinol* 299:32–38
165. Downs JL, Wise PM, E2-mediated Kiss1 drive from the AVPV is diminished at the onset of age-related reproductive decline in the female rat. *Proc First World Conference on Kisspeptin Signaling in the Brain*, Cordoba, Spain, 2008; p 54
166. Fernandez-Fernandez R, Martini AC, Navarro VM, Castellano JM, Dieguez C, Aguilar E, Pinilla L, Tena-Sempere M 2006 Novel signals for the integration of energy balance and reproduction. *Mol Cell Endocrinol* 254–255:127–132
167. Forbes S, Li XF, Kinsey-Jones J, O'Byrne K 2009 Effects of ghrelin on kisspeptin mRNA expression in the hypothalamic medial preoptic area and pulsatile luteinising hormone secretion in the female rat. *Neurosci Lett* 460:143–147
168. Navarro VM, Fernández-Fernández R, Castellano JM, Roa J, Mayen A, Barreiro ML, Gaytan F, Aguilar E, Pinilla L, Dieguez C, Tena-Sempere M 2004 Advanced vaginal opening and precocious activation of the reproductive axis by KiSS-1 peptide, the endogenous ligand of GPR54. *J Physiol* 561:379–386
169. Castellano JM, Navarro VM, Fernández-Fernández R, Roa J, Vigo E, Pineda R, Dieguez C, Aguilar E, Pinilla L, Tena-Sempere M 2006 Expression of hypothalamic KiSS-1 system and rescue of defective gonadotropic responses by kisspeptin in streptozotocin-induced diabetic male rats. *Diabetes* 55:2602–2610
170. Castellano JM, Navarro VM, Roa J, Pineda R, Sánchez-Garrido MA, García-Galiano D, Vigo E, Dieguez C, Aguilar E, Pinilla L, Tena-Sempere M 2009 Alterations in hypothalamic KiSS-1 system in experimental diabetes: early changes and functional consequences. *Endocrinology* 150:784–794
171. Roa J, Vigo E, García-Galiano D, Castellano JM, Navarro VM, Pineda R, Diéguez C, Aguilar E, Pinilla L, Tena-Sempere M 2008 Desensitization of gonadotropin responses to kisspeptin in the female rat: analyses of LH and FSH secretion at different developmental and metabolic states. *Am J Physiol Endocrinol Metab* 294:E1088–E1096
172. Castellano JM, Navarro VM, Fernández-Fernández R, Nogueiras R, Tovar S, Roa J, Vazquez MJ, Vigo E, Casanueva FF, Aguilar E, Pinilla L, Dieguez C, Tena-Sempere M 2005 Changes in hypothalamic KiSS-1 system and restoration of pubertal activation of the reproductive axis by kisspeptin in undernutrition. *Endocrinology* 146:3917–3925
173. Simonneaux V, Ansel L, Revel FG, Klosen P, Pévet P, Mikkelsen JD 2009 Kisspeptin and the seasonal control of reproduction in hamsters. *Peptides* 30:146–153
174. Clarke IJ, Smith JT, Caraty A, Goodman RL, Lehman MN 2009 Kisspeptin and seasonality in sheep. *Peptides* 30:154–163
175. Revel FG, Ansel L, Klosen P, Saboureaux M, Pévet P, Mikkelsen JD, Simonneaux V 2007 Kisspeptin: a key link to seasonal breeding. *Rev Endocr Metab Disord* 8:57–65
176. Messenger S 2005 Kisspeptin and its receptor: new gatekeepers of puberty. *J Neuroendocrinol* 17:687–688
177. Tena-Sempere M 2006 The roles of kisspeptins and G

- protein-coupled receptor-54 in pubertal development. *Curr Opin Pediatr* 18:442–447
178. **Kuohung W, Kaiser UB** 2006 GPR54 and KiSS-1: role in the regulation of puberty and reproduction. *Rev Endocr Metab Disord* 7:257–263
  179. **Seminara SB** 2006 Mechanisms of disease: the first kiss—a crucial role for kisspeptin-1 and its receptor, G-protein-coupled receptor 54, in puberty and reproduction. *Nat Clin Pract Endocrinol Metab* 2:328–334
  180. **Navarro VM, Castellano JM, García-Galiano D, Tena-Sempere M** 2007 Neuroendocrine factors in the initiation of puberty: the emergent role of kisspeptin. *Rev Endocr Metab Disord* 8:11–20
  181. **Kauffman AS, Clifton DK, Steiner RA** 2007 Emerging ideas about kisspeptin-GPR54 signaling in the neuroendocrine regulation of reproduction. *Trends Neurosci* 30:504–511
  182. **Smith JT, Clarke IJ** 2007 Kisspeptin expression in the brain: catalyst for the initiation of puberty. *Rev Endocr Metab Disord* 8:1–9
  183. **Clarkson J, Boon WC, Simpson ER, Herbison AE** 2009 Postnatal development of an estradiol-kisspeptin positive feedback mechanism implicated in puberty onset. *Endocrinology* 150:3214–3220
  184. **Matsui H, Takatsu Y, Kumano S, Matsumoto H, Ohtaki T** 2004 Peripheral administration of metastin induces marked gonadotropin release and ovulation in the rat. *Biochem Biophys Res Commun* 320:383–388
  185. **Fisher CR, Graves KH, Parlow AF, Simpson ER** 1998 Characterization of mice deficient in aromatase (ArKO) because of targeted disruption of the *cyp19* gene. *Proc Natl Acad Sci USA* 95:6965–6970
  186. **Caraty A, Fabre-Nys C, Delaleu B, Locatelli A, Bruneau G, Karsch FJ, Herbison A** 1998 Evidence that the mediobasal hypothalamus is the primary site of action of estradiol in inducing the preovulatory gonadotropin releasing hormone surge in the ewe. *Endocrinology* 139:1752–1760
  187. **Navarro VM, Sánchez-Garrido MA, Castellano JM, Roa J, García-Galiano D, Pineda R, Aguilar E, Pinilla L, Tena-Sempere M** 2009 Persistent impairment of hypothalamic KiSS-1 system after exposures to estrogenic compounds at critical periods of brain sex differentiation. *Endocrinology* 150:2359–2367
  188. **Kauffman AS**, Sex differences in the Kiss1 system of rodents as the basis for generating the GnRH/LH surge and guiding the tempo of pubertal development. *Proc First World Conference on Kisspeptin Signaling in the Brain, Cordoba, Spain, 2008*; p 27
  189. **Velasco ME, Taleisnik S** 1971 Effects of the interruption of amygdaloid and hippocampal afferents to the medial hypothalamus on gonadotrophin release. *J Endocrinol* 51:41–55
  190. **Arai AC, Orwig N** 2008 Factors that regulate KiSS1 gene expression in the hippocampus. *Brain Res* 1243:10–18
  191. **Arai AC, Xia YF, Suzuki E, Kessler M, Civelli O, Notheracker HP** 2005 Cancer metastasis-suppressing peptide metastin up-regulates excitatory synaptic transmission in hippocampal dentate granule cells. *J Neurophysiol* 94:3648–3652
  192. **Arai AC** 2009 The role of kisspeptin and GPR54 in the hippocampus. *Peptides* 30:16–25
  193. **Kauffman AS, Kim JI, Clifton DK, Steiner RA**, Regulation of Kiss1 gene expression by sex steroids in the medial amygdala of mice. *Proc of 37th Annual Meeting of the Society for Neuroscience, San Diego, 2007* (Abstract 626.10/VV13)
  194. **Nakamura Y, Aoki S, Xing Y, Sasano H, Rainey WE** 2007 Metastin stimulates aldosterone synthesis in human adrenal cells. *Reprod Sci* 14:836–845
  195. **Hauge-Evans AC, Richardson CC, Milne HM, Christie MR, Persaud SJ, Jones PM** 2006 A role for kisspeptin in islet function. *Diabetologia* 49:2131–2135
  196. **Bowe JE, King AJ, Kinsey-Jones JS, Foot VL, Li XF, O'Byrne KT, Persaud SJ, Jones PM** 2009 Kisspeptin stimulation of insulin secretion: mechanisms of action in mouse islets and rats. *Diabetologia* 52:855–862
  197. **Castellano JM, Gaytan M, Roa J, Vigo E, Navarro VM, Bellido C, Dieguez C, Aguilar E, Sánchez-Criado JE, Pellicer A, Pinilla L, Gaytan F, Tena-Sempere M** 2006 Expression of KiSS-1 in rat ovary: putative local regulator of ovulation? *Endocrinology* 147:4852–4862
  198. **Gaytán F, Gaytán M, Castellano JM, Romero M, Roa J, Aparicio B, Garrido N, Sánchez-Criado JE, Millar RP, Pellicer A, Fraser HM, Tena-Sempere M** 2009 KiSS-1 in the mammalian ovary: distribution of kisspeptin in human and marmoset and alterations in KiSS-1 mRNA levels in a rat model of ovulatory dysfunction. *Am J Physiol Endocrinol Metab* 296:E520–E531
  199. **Gaytán M, Castellano JM, Roa J, Sánchez-Criado JE, Tena-Sempere M, Gaytán F** 2007 Expression of KiSS-1 in rat oviduct: possible involvement in prevention of ectopic implantation? *Cell Tissue Res* 329:571–579
  200. **Hidden U, Bilban M, Knöfler M, Desoye G** 2007 Kisspeptins and the placenta: regulation of trophoblast invasion. *Rev Endocr Metab Disord* 8:31–39
  201. **Mead EJ, Maguire JJ, Kuc RE, Davenport AP** 2007 Kisspeptins are novel potent vasoconstrictors in humans, with a discrete localization of their receptor, G protein-coupled receptor 54, to atherosclerosis-prone vessels. *Endocrinology* 148:140–147
  202. **Popa SM, Clifton DK, Steiner RA** 2008 The role of kisspeptins and GPR54 in the neuroendocrine regulation of reproduction. *Annu Rev Physiol* 70:213–238
  203. **Dungan HM, Clifton DK, Steiner RA** 2006 Minireview: kisspeptin neurons as central processors in the regulation of gonadotropin-releasing hormone secretion. *Endocrinology* 147:1154–1158
  204. **Gottsch ML, Clifton DK, Steiner RA** 2006 Kisspeptin-GPR54 signaling in the neuroendocrine reproductive axis. *Mol Cell Endocrinol* 254–255:91–96
  205. **Wu M, Dumalska I, Morozova E, van den Pol A, Alreja M** 2009 Melanin-concentrating hormone directly inhibits GnRH neurons and blocks kisspeptin activation, linking energy balance to reproduction. *PNAS* 10.1073/Pnas.0908200106
  206. **Homma T, Sakakibara M, Yamada S, Kinoshita M, Iwata K, Tomikawa J, Kanazawa T, Matsui H, Takatsu Y, Matsumoto H, Uenoyama Y, Maeda K, Tsukamura H** 2009 Significance of neonatal testicular sex steroids to defeminize anteroventral periventricular kisspeptin neurons and the GnRH/LH surge system in male rats. *Biology of Reproduction* 10.1095/biolreprod.109.078311
